# Supplementary material for: Cells released from S. epidermidis biofilms present increased antibiotic tolerance to multiple antibiotics
Source: PeerJ. 2019 May 15;7:e6884. doi: 10.7717/peerj.6884 (PMC6525591; doi:10.7717/peerj.6884)
Supplement: Data S1 [file peerj-07-6884-s005.xlsx]

## Sheet: Vancomycin 2H
Strain:	S. epidermidis 9142		* Nd - Not detected
Antibiotic:	Vancomycin
Exposure time:	2 hours
CFU counting
Sample	Assay #	Biological replicate #	Technical replicate #	CFU/mL	Log CFU/mL	Mean Log CFU/mL	Delta Log (Ct - Antibiotic) CFU/mL
Biofilm Control	1	1	1	8000000	6.90309	7.02393	0.444431
			2	4000000	6.60206
			3	10000000	7
		2	1	12000000	7.07918
			2	6000000	6.77815
			3	12000000	7.07918
	2	1	1	12000000	7.07918
			2	10000000	7
			3	16000000	7.20412
		2	1	14000000	7.14613
			2	12000000	7.07918
			3	16000000	7.20412
	3	1	1	14000000	7.14613
			2	10000000	7
			3	6000000	6.77815
		2	1	6400000	6.80618
			2	19000000	7.27875
			3	18500000	7.26717
Biofilm with antibiotic	1	1	1	900000	5.95424	6.5795		1.06969
			2	1100000	6.04139			0.982539
			3	Nd	Nd
		2	1	8000000	6.90309			0.120842
			2	8000000	6.90309			0.120842
			3	2000000	6.30103			0.722902
	2	1	1	8000000	6.90309			0.120842
			2	6000000	6.77815			0.245781	0.444431
			3	6000000	6.77815			0.245781
		2	1	6000000	6.77815			0.245781
			2	6000000	6.77815			0.245781
			3	8000000	6.90309			0.120842
	3	1	1	2250000	6.35218			0.67175
			2	4700000	6.6721			0.351834
			3	2600000	6.41497			0.608959
		2	1	2600000	6.41497			0.608959
			2	3050000	6.4843			0.539632
			3	3100000	6.49136			0.53257
BRC Control	1	1	1	16000000	7.20412	7.19108	0.590897
			2	16000000	7.20412
			3	18000000	7.25527
		2	1	6000000	6.77815
			2	4000000	6.60206
			3	12000000	7.07918
	2	1	1	16000000	7.20412
			2	22000000	7.34242
			3	20000000	7.30103
		2	1	12000000	7.07918
			2	14000000	7.14613
			3	20000000	7.30103
	3	1	1	23000000	7.36173
			2	26000000	7.41497
			3	23000000	7.36173
		2	1	10000000	7
			2	26000000	7.41497
			3	24500000	7.38917
BRC with antibiotic	1	1	1	2000000	6.30103	6.60018		0.890047
			2	4000000	6.60206			0.589017
			3	6000000	6.77815			0.412926
		2	1	2000000	6.30103			0.890047
			2	5000000	6.69897			0.492107
			3	3000000	6.47712			0.713956
	2	1	1	4000000	6.60206			0.589017
			2	6000000	6.77815			0.412926
			3	4000000	6.60206			0.589017
		2	1	4000000	6.60206			0.589017	0.590897
			2	6000000	6.77815			0.412926
			3	4000000	6.60206			0.589017
	3	1	1	4700000	6.6721			0.518979
			2	1100000	6.04139			1.14968
			3	5300000	6.72428			0.466801
		2	1	5200000	6.716			0.475074
			2	5650000	6.75205			0.439029
			3	5950000	6.77452			0.41656
Planktonic Control	1	1	1	28000000	7.44716	6.99081	0.999859
			2	30000000	7.47712
			3	26000000	7.41497
		2	1	16000000	7.20412
			2	24000000	7.38021
			3	30000000	7.47712
	2	1	1	2400000	6.38021
			2	2400000	6.38021
			3	2200000	6.34242
		2	1	2000000	6.30103
			2	1800000	6.25527
			3	2600000	6.41497
	3	1	1	12000000	7.07918
			2	19500000	7.29003
			3	10500000	7.02119
		2	1	40500000	7.60746
			2	23500000	7.37107
			3	Nd	Nd
Planktonic with antibiotic	1	1	1	700000	5.8451	5.99095		1.14571
			2	600000	5.77815			1.21266
			3	700000	5.8451			1.14571
		2	1	800000	5.90309			1.08772
			2	700000	5.8451			1.14571
			3	500000	5.69897			1.29184
	2	1	1	400000	5.60206			1.38875
			2	800000	5.90309			1.08772	0.999859
			3	600000	5.77815			1.21266
		2	1	600000	5.77815			1.21266
			2	600000	5.77815			1.21266
			3	1000000	6			0.990809
	3	1	1	1950000	6.29003			0.700774
			2	1950000	6.29003			0.700774
			3	2450000	6.38917			0.601643
		2	1	3750000	6.57403			0.416778
			2	3530000	6.54777			0.443034
			3	Nd	Nd			Nd

## Sheet: Dicloxacillin 2H
Strain:	S. epidermidis 9142		* Nd - Not detected
Antibiotic:	Dicloxacillin
Exposure time:	2 hours
CFU counting
Sample	Assay #	Biological replicate #	Technical replicate #	CFU/mL	Log CFU/mL
Biofilm Control	1	1	1	16000000	7.20412
			2	18000000	7.25527
			3	30000000	7.47712
		2	1	16000000	7.20412
			2	22000000	7.34242
			3	14000000	7.14613
	2	1	1	16000000	7.20412
			2	8000000	6.90309
			3	10000000	7
		2	1	18000000	7.25527
			2	12000000	7.07918
			3	14000000	7.14613
	3	1	1	10000000	7
			2	6000000	6.77815
			3	12000000	7.07918
		2	1	8000000	6.90309
			2	14000000	7.14613
			3	6000000	6.77815
	4	1	1	6000000	6.77815
			2	4400000	6.64345
			3	4800000	6.68124
		2	1	4400000	6.64345
			2	4600000	6.66276
			3	5800000	6.76343
	5	1	1	2800000	6.44716
			2	2200000	6.34242
			3	3000000	6.47712
		2	1	3400000	6.53148
			2	3000000	6.47712
			3	32000000	7.50515
Biofilm with antibiotic	1	1	1	6000000	6.77815
			2	10000000	7
			3	4000000	6.60206
		2	1	6000000	6.77815
			2	12000000	7.07918
			3	8000000	6.90309
	2	1	1	4000000	6.60206
			2	6000000	6.77815
			3	8000000	6.90309
		2	1	6000000	6.77815
			2	6000000	6.77815
			3	8000000	6.90309
	3	1	1	4200000	6.62325
			2	3800000	6.57978	#REF!
			3	3400000	6.53148
		2	1	4000000	6.60206
			2	4200000	6.62325
			3	3600000	6.5563
	4	1	1	3200000	6.50515
			2	3800000	6.57978
			3	2000000	6.30103
		2	1	3200000	6.50515
			2	3600000	6.5563
			3	3000000	6.47712
	5	1	1	1600000	6.20412
			2	1800000	6.25527
			3	1200000	6.07918
		2	1	1200000	6.07918
			2	2000000	6.30103
			3	1400000	6.14613
BRC Control	1	1	1	42000000	7.62325
			2	32000000	7.50515
			3	46000000	7.66276
		2	1	42000000	7.62325
			2	46000000	7.66276
			3	50000000	7.69897
	2	1	1	32000000	7.50515
			2	48000000	7.68124
			3	36000000	7.5563
		2	1	44000000	7.64345
			2	46000000	7.66276
			3	36000000	7.5563
	3	1	1	4600000	6.66276
			2	4800000	6.68124
			3	4000000	6.60206
		2	1	5000000	6.69897
			2	5200000	6.716
			3	4400000	6.64345
	4	1	1	5400000	6.73239
			2	4800000	6.68124
			3	4600000	6.66276
		2	1	5200000	6.716
			2	4800000	6.68124
			3	5800000	6.76343
	5	1	1	5200000	6.716
			2	5400000	6.73239
			3	5600000	6.74819
		2	1	5800000	6.76343
			2	5600000	6.74819
			3	5400000	6.73239
BRC with antibiotic	1	1	1	4000000	6.60206
			2	4000000	6.60206
			3	6000000	6.77815
		2	1	8000000	6.90309
			2	6000000	6.77815
			3	4000000	6.60206
	2	1	1	4000000	6.60206
			2	8000000	6.90309
			3	10000000	7
		2	1	4000000	6.60206
			2	6000000	6.77815
			3	4000000	6.60206	#REF!
	3	1	1	800000	5.90309
			2	800000	5.90309
			3	200000	5.30103
		2	1	800000	5.90309
			2	400000	5.60206
			3	600000	5.77815
	4	1	1	600000	5.77815
			2	400000	5.60206
			3	400000	5.60206
		2	1	600000	5.77815
			2	800000	5.90309
			3	600000	5.77815
	5	1	1	400000	5.60206
			2	800000	5.90309
			3	400000	5.60206
		2	1	400000	5.60206
			2	800000	5.90309
			3	600000	5.77815
Planktonic Control	1	1	1	3800000	6.57978
			2	5000000	6.69897
			3	4600000	6.66276
		2	1	3000000	6.47712
			2	3600000	6.5563
			3	3200000	6.50515
	2	1	1	34000000	7.53148
			2	32000000	7.50515
			3	38000000	7.57978
		2	1	36000000	7.5563
			2	44000000	7.64345
			3	46000000	7.66276
	3	1	1	14000000	7.14613
			2	16000000	7.20412
			3	24000000	7.38021
		2	1	14000000	7.14613
			2	22000000	7.34242
			3	12000000	7.07918
	4	1	1	16000000	7.20412
			2	16000000	7.20412
			3	14000000	7.14613
		2	1	18000000	7.25527
			2	16000000	7.20412
			3	20000000	7.30103
	5	1	1	5600000	6.74819
			2	4600000	6.66276
			3	5000000	6.69897
		2	1	4800000	6.68124
			2	5000000	6.69897
			3	6200000	6.79239
Planktonic with antibiotic	1	1	1	350000	5.54407	#REF!
			2	410000	5.61278
			3	200000	5.30103
		2	1	400000	5.60206
			2	400000	5.60206
			3	400000	5.60206
	2	1	1	4000000	6.60206
			2	2000000	6.30103
			3	6000000	6.77815
		2	1	2000000	6.30103
			2	4000000	6.60206
			3	6000000	6.77815
	3	1	1	2200000	6.34242
			2	1600000	6.20412
			3	1400000	6.14613
		2	1	2000000	6.30103
			2	1800000	6.25527
			3	1600000	6.20412
	4	1	1	1000000	6
			2	800000	5.90309
			3	1400000	6.14613
		2	1	1200000	6.07918
			2	1000000	6
			3	1600000	6.20412
	5	1	1	400000	5.60206
			2	200000	5.30103
			3	600000	5.77815
		2	1	600000	5.77815
			2	400000	5.60206
			3	200000	5.30103

## Sheet: Teicoplanin 2H
Strain:	S. epidermidis 9142		* Nd - Not detected
Antibiotic:	Teicoplanin
Exposure time:	2 hours
CFU counting
Sample	Assay #	Biological replicate #	Technical replicate #	CFU/mL	Log CFU/mL
Biofilm Control	1	1	1	3400000	6.53148
			2	3000000	6.47712
			3	3600000	6.5563
		2	1	4600000	6.66276
			2	3800000	6.57978
			3	3400000	6.53148
	2	1	1	5600000	6.74819
			2	5800000	6.76343
			3	6000000	6.77815
		2	1	5000000	6.69897
			2	4800000	6.68124
			3	5800000	6.76343
	3	1	1	8000000	6.90309
			2	10000000	7
			3	12000000	7.07918
		2	1	6000000	6.77815
			2	14000000	7.14613
			3	16000000	7.20412
	4	1	1	5400000	6.73239
			2	5600000	6.74819
			3	5000000	6.69897
		2	1	2800000	6.44716
			2	3800000	6.57978
			3	3800000	6.57978
	5	1	1	3800000	6.57978
			2	3600000	6.5563
			3	4600000	6.66276
		2	1	4400000	6.64345
			2	4000000	6.60206
			3	3600000	6.5563
Biofilm with antibiotic	1	1	1	3000000	6.47712
			2	3200000	6.50515
			3	2200000	6.34242
		2	1	2400000	6.38021
			2	2600000	6.41497
			3	3200000	6.50515
	2	1	1	4400000	6.64345
			2	5200000	6.716
			3	4800000	6.68124
		2	1	4800000	6.68124
			2	4600000	6.66276
			3	3800000	6.57978
	3	1	1	10000000	7
			2	10000000	7
			3	12000000	7.07918
		2	1	6000000	6.77815
			2	8000000	6.90309
			3	8000000	6.90309
	4	1	1	4400000	6.64345
			2	3000000	6.47712
			3	3400000	6.53148
		2	1	3400000	6.53148
			2	3800000	6.57978
			3	3200000	6.50515
	5	1	1	4000000	6.60206
			2	2600000	6.41497
			3	2800000	6.44716
		2	1	2600000	6.41497
			2	2400000	6.38021
			3	3400000	6.53148
BRC Control	1	1	1	3200000	6.50515
			2	3800000	6.57978
			3	2800000	6.44716
		2	1	2600000	6.41497
			2	2800000	6.44716
			3	3200000	6.50515
	2	1	1	5000000	6.69897
			2	5400000	6.73239
			3	4200000	6.62325
		2	1	4600000	6.66276
			2	5000000	6.69897
			3	4600000	6.66276
	3	1	1	16000000	7.20412
			2	14000000	7.14613
			3	12000000	7.07918
		2	1	12000000	7.07918
			2	12000000	7.07918
			3	10000000	7
	4	1	1	8000000	6.90309
			2	6000000	6.77815
			3	6000000	6.77815
		2	1	8000000	6.90309
			2	10000000	7
			3	6000000	6.77815
	5	1	1	2800000	6.44716
			2	2400000	6.38021
			3	3200000	6.50515
		2	1	3600000	6.5563
			2	4400000	6.64345
			3	3200000	6.50515
BRC with antibiotic	1	1	1	2200000	6.34242
			2	1600000	6.20412
			3	2000000	6.30103
		2	1	2200000	6.34242
			2	1800000	6.25527
			3	2600000	6.41497
	2	1	1	2600000	6.41497
			2	3200000	6.50515
			3	3000000	6.47712
		2	1	3800000	6.57978
			2	3400000	6.53148
			3	4000000	6.60206
	3	1	1	Nd	Nd
			2	Nd	Nd
			3	Nd	Nd
		2	1	Nd	Nd
			2	Nd	Nd
			3	Nd	Nd
	4	1	1	Nd	Nd
			2	Nd	Nd
			3	4000000	6.60206
		2	1	Nd	Nd
			2	4000000	6.60206
			3	Nd	Nd
	5	1	1	3800000	6.57978
			2	3000000	6.47712
			3	3200000	6.50515
		2	1	2600000	6.41497
			2	2800000	6.44716
			3	1800000	6.25527
Planktonic Control	1	1	1	2000000	6.30103
			2	2800000	6.44716
			3	2600000	6.41497
		2	1	2600000	6.41497
			2	2200000	6.34242
			3	2400000	6.38021
	2	1	1	12000000	7.07918
			2	10000000	7
			3	8000000	6.90309
		2	1	12000000	7.07918
			2	14000000	7.14613
			3	10000000	7
	3	1	1	14000000	7.14613
			2	16000000	7.20412
			3	16000000	7.20412
		2	1	12000000	7.07918
			2	14000000	7.14613
			3	10000000	7
	4	1	1	10000000	7
			2	12000000	7.07918
			3	8000000	6.90309
		2	1	16000000	7.20412
			2	10000000	7
			3	12000000	7.07918
	5	1	1	30000000	7.47712
			2	32000000	7.50515
			3	32000000	7.50515
		2	1	36000000	7.5563
			2	30000000	7.47712
			3	34000000	7.53148
Planktonic with antibiotic	1	1	1	160000	5.20412
			2	200000	5.30103
			3	180000	5.25527
		2	1	220000	5.34242
			2	160000	5.20412
			3	260000	5.41497
	2	1	1	1200000	6.07918
			2	1000000	6
			3	1400000	6.14613
		2	1	1000000	6
			2	1000000	6
			3	800000	5.90309
	3	1	1	1200000	6.07918
			2	1800000	6.25527
			3	1200000	6.07918
		2	1	2200000	6.34242
			2	1400000	6.14613
			3	2000000	6.30103
	4	1	1	800000	5.90309
			2	1600000	6.20412
			3	800000	5.90309
		2	1	1200000	6.07918
			2	800000	5.90309
			3	1200000	6.07918
	5	1	1	2000000	6.30103
			2	2000000	6.30103
			3	2000000	6.30103
		2	1	4000000	6.60206
			2	2000000	6.30103
			3	2000000	6.30103

## Sheet: Ciprofloxacin 2H
Strain:	S. epidermidis 9142		* Nd - Not detected
Antibiotic:	Ciprofloxacin
Exposure time:	2 hours
CFU counting
Sample	Assay #	Biological replicate #	Technical replicate #	CFU/mL	Log CFU/mL
Biofilm Control	1	1	1	2200000	6.34242
			2	1600000	6.20412
			3	3200000	6.50515
		2	1	2200000	6.34242
			2	2600000	6.41497
			3	1400000	6.14613
	2	1	1	5600000	6.74819
			2	5800000	6.76343
			3	6000000	6.77815
		2	1	5000000	6.69897
			2	6000000	6.77815
			3	5800000	6.76343
	3	1	1	3800000	6.57978
			2	3600000	6.5563
			3	4600000	6.66276
		2	1	4400000	6.64345
			2	4000000	6.60206
			3	3600000	6.5563
Biofilm with antibiotic	1	1	1	1400000	6.14613
			2	1200000	6.07918
			3	1400000	6.14613
		2	1	2200000	6.34242
			2	1400000	6.14613
			3	2000000	6.30103
	2	1	1	6000000	6.77815
			2	5000000	6.69897
			3	4600000	6.66276
		2	1	6000000	6.77815
			2	5400000	6.73239
			3	5000000	6.69897
	3	1	1	3200000	6.50515
			2	4400000	6.64345
			3	3400000	6.53148
		2	1	4400000	6.64345
			2	3600000	6.5563
			3	3600000	6.5563
BRC Control	1	1	1	2600000	6.41497
			2	2200000	6.34242
			3	3600000	6.5563
		2	1	3000000	6.47712
			2	3400000	6.53148
			3	3200000	6.50515
	2	1	1	4400000	6.64345
			2	5000000	6.69897
			3	4200000	6.62325
		2	1	4600000	6.66276
			2	5200000	6.716
			3	3600000	6.5563
	3	1	1	2800000	6.44716
			2	4400000	6.64345
			3	3200000	6.50515
		2	1	3600000	6.5563
			2	4400000	6.64345
			3	3200000	6.50515
BRC with antibiotic	1	1	1	2600000	6.41497
			2	3000000	6.47712
			3	3000000	6.47712
		2	1	2600000	6.41497
			2	1800000	6.25527
			3	3600000	6.5563
	2	1	1	3600000	6.5563
			2	4000000	6.60206
			3	4200000	6.62325
		2	1	4400000	6.64345
			2	4600000	6.66276
			3	4000000	6.60206
	3	1	1	3200000	6.50515
			2	2800000	6.44716
			3	3400000	6.53148
		2	1	3600000	6.5563
			2	3000000	6.47712
			3	4200000	6.62325
Planktonic Control	1	1	1	Nd	Nd
			2	Nd	Nd
			3	Nd	Nd
		2	1	Nd	Nd
			2	Nd	Nd
			3	Nd	Nd
	2	1	1	18000000	7.25527
			2	10000000	7
			3	8000000	6.90309
		2	1	8000000	6.90309
			2	8000000	6.90309
			3	14000000	7.14613
	3	1	1	3000000	6.47712
			2	3200000	6.50515
			3	3200000	6.50515
		2	1	3600000	6.5563
			2	3000000	6.47712
			3	3400000	6.53148
Planktonic with antibiotic	1	1	1	Nd	Nd
			2	Nd	Nd
			3	Nd	Nd
		2	1	Nd	Nd
			2	Nd	Nd
			3	Nd	Nd
	2	1	1	5200000	6.716
			2	4400000	6.64345
			3	4600000	6.66276
		2	1	6400000	6.80618
			2	5800000	6.76343
			3	6000000	6.77815
	3	1	1	1600000	6.20412
			2	2000000	6.30103
			3	1400000	6.14613
		2	1	1200000	6.07918
			2	2200000	6.34242
			3	1400000	6.14613

## Sheet: Rifampicin 2H
Strain:	S. epidermidis 9142		* Nd - Not detected
Antibiotic:	Rifampicin
Exposure time:	2 hours
CFU counting
Sample	Assay #	Biological replicate #	Technical replicate #	CFU/mL	Log CFU/mL
Biofilm Control	1	1	1	16000000	7.20412
			2	18000000	7.25527
			3	30000000	7.47712
		2	1	22000000	7.34242
			2	14000000	7.14613
			3	16000000	7.20412
	2	1	1	14000000	7.14613
			2	12000000	7.07918
			3	14000000	7.14613
		2	1	10000000	7
			2	12000000	7.07918
			3	8000000	6.90309
	3	1	1	9500000	6.97772
			2	7400000	6.86923
			3	3000000	6.47712
		2	1	12500000	7.09691
			2	3900000	6.59106
			3	Nd	Nd
Biofilm with antibiotic	1	1	1	200000	5.30103
			2	400000	5.60206
			3	600000	5.77815
		2	1	400000	5.60206
			2	200000	5.30103
			3	200000	5.30103
	2	1	1	400000	5.60206
			2	400000	5.60206
			3	1000000	6
		2	1	400000	5.60206
			2	600000	5.77815
			3	600000	5.77815
	3	1	1	1250000	6.09691
			2	265000	5.42325
			3	110000	5.04139
		2	1	295000	5.46982
			2	190000	5.27875
			3	Nd	Nd
BRC Control	1	1	1	22000000	7.34242
			2	32000000	7.50515
			3	26000000	7.41497
		2	1	22000000	7.34242
			2	28000000	7.44716
			3	30000000	7.47712
	2	1	1	38000000	7.57978
			2	34000000	7.53148
			3	26000000	7.41497
		2	1	34000000	7.53148
			2	46000000	7.66276
			3	44000000	7.64345
	3	1	1	7200000	6.85733
			2	10500000	7.02119
			3	6550000	6.81624
		2	1	9500000	6.97772
			2	5800000	6.76343
			3	Nd	Nd
BRC with antibiotic	1	1	1	320000	5.50515
			2	260000	5.41497
			3	340000	5.53148
		2	1	280000	5.44716
			2	360000	5.5563
			3	380000	5.57978
	2	1	1	400000	5.60206
			2	800000	5.90309
			3	600000	5.77815
		2	1	400000	5.60206
			2	600000	5.77815
			3	1000000	6
	3	1	1	1500000	6.17609
			2	600000	5.77815
			3	210000	5.32222
		2	1	475000	5.67669
			2	245000	5.38917
			3	Nd	Nd
Planktonic Control	1	1	1	18000000	7.25527
			2	30000000	7.47712
			3	28000000	7.44716
		2	1	22000000	7.34242
			2	26000000	7.41497
			3	24000000	7.38021
	2	1	1	32000000	7.50515
			2	40000000	7.60206
			3	34000000	7.53148
		2	1	22000000	7.34242
			2	38000000	7.57978
			3	36000000	7.5563
	3	1	1	9500000	6.97772
			2	40000000	7.60206
			3	34000000	7.53148
		2	1	22000000	7.34242
			2	38000000	7.57978
			3	36000000	Nd
Planktonic with antibiotic	1	1	1	600000	5.77815
			2	200000	5.30103
			3	400000	5.60206
		2	1	600000	5.77815
			2	400000	5.60206
			3	400000	5.60206
	2	1	1	300000	5.47712
			2	200000	5.30103
			3	280000	5.44716
		2	1	240000	5.38021
			2	260000	5.41497
			3	200000	5.30103
	3	1	1	500000	5.69897
			2	770000	5.88649
			3	40000	4.60206
		2	1	755000	5.87795
			2	41000	4.61278
			3	Nd	Nd

## Sheet: Erythromycin 2H
Strain:	S. epidermidis 9142		* Nd - Not detected
Antibiotic:	Erythromycin
Exposure time:	2 hours
CFU counting
Sample	Assay #	Biological replicate #	Technical replicate #	CFU/mL	Log CFU/mL
Biofilm Control	1	1	1	5800000	6.76343
			2	6000000	6.77815
			3	6400000	6.80618
		2	1	5600000	6.74819
			2	6600000	6.81954
			3	5800000	6.76343
	2	1	1	10000000	7
			2	6000000	6.77815
			3	8000000	6.90309
		2	1	6000000	6.77815
			2	8000000	6.90309
			3	8000000	6.90309
	3	1	1	3400000	6.53148
			2	3000000	6.47712
			3	4200000	6.62325
		2	1	3600000	6.5563
			2	4800000	6.68124
			3	3200000	6.50515
	4	1	1	6200000	6.79239
			2	6800000	6.83251
			3	7200000	6.85733
		2	1	7400000	6.86923
			2	7800000	6.89209
			3	6400000	6.80618
	5	1	1	2600000	6.41497
			2	2800000	6.44716
			3	4000000	6.60206
		2	1	3000000	6.47712
			2	2000000	6.30103
			3	3800000	6.57978
Biofilm with antibiotic	1	1	1	3800000	6.57978
			2	3800000	6.57978
			3	5000000	6.69897
		2	1	3400000	6.53148
			2	3800000	6.57978
			3	4600000	6.66276
	2	1	1	4000000	6.60206
			2	6000000	6.77815
			3	4000000	6.60206
		2	1	4000000	6.60206
			2	6000000	6.77815
			3	6000000	6.77815
	3	1	1	2800000	6.44716
			2	2600000	6.41497
			3	2200000	6.34242
		2	1	2000000	6.30103
			2	2200000	6.34242
			3	2200000	6.34242
	4	1	1	5800000	6.76343
			2	5200000	6.716
			3	4000000	6.60206
		2	1	4000000	6.60206
			2	3600000	6.5563
			3	3200000	6.50515
	5	1	1	2200000	6.34242
			2	2400000	6.38021
			3	1400000	6.14613
		2	1	1400000	6.14613
			2	1800000	6.25527
			3	1200000	6.07918
BRC Control	1	1	1	6000000	6.77815
			2	5600000	6.74819
			3	6800000	6.83251
		2	1	6000000	6.77815
			2	6600000	6.81954
			3	5800000	6.76343
	2	1	1	5600000	6.74819
			2	3600000	6.5563
			3	4800000	6.68124
		2	1	5800000	6.76343
			2	6200000	6.79239
			3	6000000	6.77815
	3	1	1	3200000	6.50515
			2	2200000	6.34242
			3	3200000	6.50515
		2	1	2200000	6.34242
			2	3600000	6.5563
			3	3400000	6.53148
	4	1	1	3000000	6.47712
			2	3400000	6.53148
			3	5000000	6.69897
		2	1	3800000	6.57978
			2	3200000	6.50515
			3	3400000	6.53148
	5	1	1	2200000	6.34242
			2	2000000	6.30103
			3	2600000	6.41497
		2	1	1600000	6.20412
			2	2800000	6.44716
			3	2600000	6.41497
BRC with antibiotic	1	1	1	4000000	6.60206
			2	6000000	6.77815
			3	4000000	6.60206
		2	1	4000000	6.60206
			2	4000000	6.60206
			3	4000000	6.60206
	2	1	1	3800000	6.57978
			2	4000000	6.60206
			3	3400000	6.53148
		2	1	2800000	6.44716
			2	3800000	6.57978
			3	3600000	6.5563
	3	1	1	1800000	6.25527
			2	1400000	6.14613
			3	1200000	6.07918
		2	1	1400000	6.14613
			2	2000000	6.30103
			3	1800000	6.25527
	4	1	1	1600000	6.20412
			2	1400000	6.14613
			3	1400000	6.14613
		2	1	2200000	6.34242
			2	1600000	6.20412
			3	1600000	6.20412
	5	1	1	1400000	6.14613
			2	1200000	6.07918
			3	1000000	6
		2	1	1600000	6.20412
			2	1600000	6.20412
			3	1200000	6.07918
Planktonic Control	1	1	1	48000000	7.68124
			2	46000000	7.66276
			3	46000000	7.66276
		2	1	50000000	7.69897
			2	58000000	7.76343
			3	60000000	7.77815
	2	1	1	8000000	6.90309
			2	8000000	6.90309
			3	10000000	7
		2	1	12000000	7.07918
			2	14000000	7.14613
			3	8000000	6.90309
	3	1	1	4400000	6.64345
			2	4600000	6.66276
			3	3800000	6.57978
		2	1	4200000	6.62325
			2	3600000	6.5563
			3	3200000	6.50515
	4	1	1	50000000	7.69897
			2	44000000	7.64345
			3	46000000	7.66276
		2	1	46000000	7.66276
			2	56000000	7.74819
			3	48000000	7.68124
	5	1	1	3400000	6.53148
			2	3200000	6.50515
			3	3800000	6.57978
		2	1	3800000	6.57978
			2	4200000	6.62325
			3	4400000	6.64345
Planktonic with antibiotic	1	1	1	4000000	6.60206
			2	4000000	6.60206
			3	6000000	6.77815
		2	1	4000000	6.60206
			2	8000000	6.90309
			3	4000000	6.60206
	2	1	1	2000000	6.30103
			2	2000000	6.30103
			3	4000000	6.60206
		2	1	2000000	6.30103
			2	4000000	6.60206
			3	2000000	6.30103
	3	1	1	400000	5.60206
			2	400000	5.60206
			3	600000	5.77815
		2	1	400000	5.60206
			2	400000	5.60206
			3	200000	5.30103
	4	1	1	4000000	6.60206
			2	2000000	6.30103
			3	4000000	6.60206
		2	1	6000000	6.77815
			2	4000000	6.60206
			3	4000000	6.60206
	5	1	1	600000	5.77815
			2	400000	5.60206
			3	400000	5.60206
		2	1	200000	5.30103
			2	400000	5.60206
			3	600000	5.77815

## Sheet: Gentamicin 2H
Strain:	S. epidermidis 9142		* Nd - Not detected
Antibiotic:	Gentamicin
Exposure time:	2 hours
CFU counting
Sample	Assay #	Biological replicate #	Technical replicate #	CFU/mL	Log CFU/mL
Biofilm Control	1	1	1	10000000	7
			2	8000000	6.90309
			3	4000000	6.60206
		2	1	16000000	7.20412
			2	12000000	7.07918
			3	18000000	7.25527
	2	1	1	16000000	7.20412
			2	14000000	7.14613
			3	18000000	7.25527
		2	1	18000000	7.25527
			2	22000000	7.34242
			3	30000000	7.47712
	3	1	1	4600000	6.66276
			2	4800000	6.68124
			3	5200000	6.716
		2	1	5000000	6.69897
			2	5400000	6.73239
			3	4200000	6.62325
	4	1	1	4000000	6.60206
			2	4400000	6.64345
			3	4800000	6.68124
		2	1	4400000	6.64345
			2	4600000	6.66276
			3	4200000	6.62325
	5	1	1	4600000	6.66276
			2	4200000	6.62325
			3	3800000	6.57978
		2	1	3400000	6.53148
			2	4000000	6.60206
			3	3600000	6.5563
Biofilm with antibiotic	1	1	1	320000	5.50515
			2	260000	5.41497
			3	200000	5.30103
		2	1	360000	5.5563
			2	260000	5.41497
			3	380000	5.57978
	2	1	1	200000	5.30103
			2	400000	5.60206
			3	400000	5.60206
		2	1	400000	5.60206
			2	400000	5.60206
			3	200000	5.30103
	3	1	1	220000	5.34242
			2	180000	5.25527
			3	120000	5.07918
		2	1	140000	5.14613
			2	120000	5.07918
			3	140000	5.14613
	4	1	1	200000	5.30103
			2	140000	5.14613
			3	200000	5.30103
		2	1	220000	5.34242
			2	140000	5.14613
			3	220000	5.34242
	5	1	1	120000	5.07918
			2	100000	5
			3	80000	4.90309
		2	1	100000	5
			2	120000	5.07918
			3	140000	5.14613
BRC Control	1	1	1	32000000	7.50515
			2	34000000	7.53148
			3	28000000	7.44716
		2	1	32000000	7.50515
			2	24000000	7.38021
			3	30000000	7.47712
	2	1	1	22000000	7.34242
			2	30000000	7.47712
			3	20000000	7.30103
		2	1	26000000	7.41497
			2	24000000	7.38021
			3	28000000	7.44716
	3	1	1	5600000	6.74819
			2	4400000	6.64345
			3	5600000	6.74819
		2	1	4400000	6.64345
			2	4400000	6.64345
			3	5400000	6.73239
	4	1	1	3200000	6.50515
			2	2400000	6.38021
			3	2600000	6.41497
		2	1	3400000	6.53148
			2	2800000	6.44716
			3	2800000	6.44716
	5	1	1	5200000	6.716
			2	6000000	6.77815
			3	5800000	6.76343
		2	1	5800000	6.76343
			2	5200000	6.716
			3	5600000	6.74819
BRC with antibiotic	1	1	1	60000	4.77815
			2	140000	5.14613
			3	100000	5
		2	1	80000	4.90309
			2	80000	4.90309
			3	20000	4.30103
	2	1	1	160000	5.20412
			2	100000	5
			3	140000	5.14613
		2	1	120000	5.07918
			2	120000	5.07918
			3	180000	5.25527
	3	1	1	80000	4.90309
			2	40000	4.60206
			3	60000	4.77815
		2	1	60000	4.77815
			2	40000	4.60206
			3	60000	4.77815
	4	1	1	80000	4.90309
			2	40000	4.60206
			3	60000	4.77815
		2	1	60000	4.77815
			2	40000	4.60206
			3	60000	4.77815
	5	1	1	80000	4.90309
			2	40000	4.60206
			3	60000	4.77815
		2	1	60000	4.77815
			2	40000	4.60206
			3	60000	4.77815
Planktonic Control	1	1	1	26000000	7.41497
			2	36000000	7.5563
			3	32000000	7.50515
		2	1	34000000	7.53148
			2	24000000	7.38021
			3	26000000	7.41497
	2	1	1	34000000	7.53148
			2	38000000	7.57978
			3	32000000	7.50515
		2	1	32000000	7.50515
			2	36000000	7.5563
			3	24000000	7.38021
	3	1	1	42000000	7.62325
			2	40000000	7.60206
			3	34000000	7.53148
		2	1	34000000	7.53148
			2	38000000	7.57978
			3	30000000	7.47712
	4	1	1	46000000	7.66276
			2	56000000	7.74819
			3	50000000	7.69897
		2	1	46000000	7.66276
			2	50000000	7.69897
			3	60000000	7.77815
	5	1	1	56000000	7.74819
			2	58000000	7.76343
			3	50000000	7.69897
		2	1	48000000	7.68124
			2	50000000	7.69897
			3	62000000	7.79239
Planktonic with antibiotic	1	1	1	140000	5.14613
			2	260000	5.41497
			3	220000	5.34242
		2	1	220000	5.34242
			2	220000	5.34242
			3	120000	5.07918
	2	1	1	140000	5.14613
			2	120000	5.07918
			3	80000	4.90309
		2	1	80000	4.90309
			2	160000	5.20412
			3	120000	5.07918
	3	1	1	160000	5.20412
			2	220000	5.34242
			3	120000	5.07918
		2	1	140000	5.14613
			2	100000	5
			3	200000	5.30103
	4	1	1	300000	5.47712
			2	360000	5.5563
			3	320000	5.50515
		2	1	380000	5.57978
			2	420000	5.62325
			3	300000	5.47712
	5	1	1	160000	5.20412
			2	200000	5.30103
			3	140000	5.14613
		2	1	320000	5.50515
			2	180000	5.25527
			3	200000	5.30103

## Sheet: Linezolid 2H
Strain:	S. epidermidis 9142		* Nd - Not detected
Antibiotic:	Linezolid
Exposure time:	2 hours
CFU counting
Sample	Assay #	Biological replicate #	Technical replicate #	CFU/mL	Log CFU/mL	Log CFU/mL
Biofilm Control	1	1	1		16000000	7.20412
			2		10000000	7
			3		6000000	6.77815
		2	1		14000000	7.14613
			2		12000000	7.07918
			3		8000000	6.90309
	2	1	1		8000000	6.90309
			2		16000000	7.20412
			3		10000000	7
		2	1		14000000	7.14613
			2		10000000	7
			3		16000000	7.20412
	3	1	1		24000000	7.38021
			2		18000000	7.25527
			3		20000000	7.30103
		2	1		24000000	7.38021
			2		24000000	7.38021
			3		28000000	7.44716
Biofilm with antibiotic	1	1	1		3800000	6.57978
			2		4400000	6.64345
			3		3000000	6.47712
		2	1		3600000	6.5563
			2		2000000	6.30103
			3		4800000	6.68124
	2	1	1		2000000	6.30103
			2		2000000	6.30103
			3		4000000	6.60206
		2	1		4000000	6.60206
			2		4000000	6.60206
			3		4000000	6.60206
	3	1	1		8000000	6.90309
			2		6000000	6.77815
			3		10000000	7
		2	1		12000000	7.07918
			2		10000000	7
			3		4000000	6.60206
BRC Control	1	1	1		14000000	7.14613
			2		8000000	6.90309
			3		16000000	7.20412
		2	1		10000000	7
			2		14000000	7.14613
			3		20000000	7.30103
	2	1	1		22000000	7.34242
			2		26000000	7.41497
			3		18000000	7.25527
		2	1		18000000	7.25527
			2		22000000	7.34242
			3		28000000	7.44716
	3	1	1		22000000	7.34242
			2		28000000	7.44716
			3		26000000	7.41497
		2	1		28000000	7.44716
			2		32000000	7.50515
			3		22000000	7.34242
BRC with antibiotic	1	1	1		16000000	7.20412
			2		10000000	7
			3		8000000	6.90309
		2	1		8000000	6.90309
			2		14000000	7.14613
			3		6000000	6.77815
	2	1	1		12000000	7.07918
			2		6000000	6.77815
			3		12000000	7.07918
		2	1		20000000	7.30103
			2		10000000	7
			3		14000000	7.14613
	3	1	1		10000000	7
			2		8000000	6.90309
			3		12000000	7.07918
		2	1		12000000	7.07918
			2		14000000	7.14613
			3		6000000	6.77815
Planktonic Control	1	1	1		12000000	7.07918
			2		4000000	6.60206
			3		6000000	6.77815
		2	1		10000000	7
			2		8000000	6.90309
			3		14000000	7.14613
	2	1	1		16000000	7.20412
			2		12000000	7.07918
			3		20000000	7.30103
		2	1		26000000	7.41497
			2		30000000	7.47712
			3		18000000	7.25527
	3	1	1		24000000	7.38021
			2		32000000	7.50515
			3		22000000	7.34242
		2	1		30000000	7.47712
			2		20000000	7.30103
			3		26000000	7.41497
Planktonic with antibiotic	1	1	1		4000000	6.60206
			2		4000000	6.60206
			3		4000000	6.60206
		2	1		4000000	6.60206
			2		6000000	6.77815
			3		4000000	6.60206
	2	1	1		8000000	6.90309
			2		6000000	6.77815
			3		8000000	6.90309
		2	1		4000000	6.60206
			2		6000000	6.77815
			3		6000000	6.77815
	3	1	1		6000000	6.77815
			2		8000000	6.90309
			3		4000000	6.60206
		2	1		4000000	6.60206
			2		10000000	7
			3		6000000	6.77815

## Sheet: Tetracycline 2H
Strain:	S. epidermidis 9142		* Nd - Not detected
Antibiotic:	Tetracycline
Exposure time:	2 hours
CFU counting
Sample	Assay #	Biological replicate #	Technical replicate #	CFU/mL	Log CFU/mL
Biofilm Control	1	1	1	32000000	7.50515
			2	38000000	7.57978
			3	28000000	7.44716
		2	1	30000000	7.47712
			2	26000000	7.41497
			3	24000000	7.38021
	2	1	1	32000000	7.50515
			2	30000000	7.47712
			3	26000000	7.41497
		2	1	28000000	7.44716
			2	38000000	7.57978
			3	36000000	7.5563
	3	1	1	6600000	6.81954
			2	13000000	7.11394
			3	11000000	7.04139
		2	1	9500000	6.97772
			2	6100000	6.78533
			3	7000000	6.8451
Biofilm with antibiotic	1	1	1	1000000	6
			2	800000	5.90309
			3	1200000	6.07918
		2	1	800000	5.90309
			2	1400000	6.14613
			3	1000000	6
	2	1	1	1400000	6.14613
			2	1200000	6.07918
			3	1400000	6.14613
		2	1	400000	5.60206
			2	1000000	6
			3	1000000	6
	3	1	1	700000	5.8451
			2	340000	5.53148
			3	610000	5.78533
		2	1	470000	5.6721
			2	1600000	6.20412
			3	1600000	6.20412
BRC Control	1	1	1	52000000	7.716
			2	50000000	7.69897
			3	44000000	7.64345
		2	1	56000000	7.74819
			2	48000000	7.68124
			3	54000000	7.73239
	2	1	1	30000000	7.47712
			2	34000000	7.53148
			3	36000000	7.5563
		2	1	34000000	7.53148
			2	28000000	7.44716
			3	36000000	7.5563
	3	1	1	12550000	7.09864
			2	13000000	7.11394
			3	10000000	7
		2	1	9100000	6.95904
			2	11500000	7.0607
			3	8250000	6.91645
BRC with antibiotic	1	1	1	400000	5.60206
			2	400000	5.60206
			3	400000	5.60206
		2	1	400000	5.60206
			2	400000	5.60206
			3	600000	5.77815
	2	1	1	6000000	6.77815
			2	8000000	6.90309
			3	4000000	6.60206
		2	1	6000000	6.77815
			2	8000000	6.90309
			3	2000000	6.30103
	3	1	1	2100000	6.32222
			2	1600000	6.20412
			3	1800000	6.25527
		2	1	1800000	6.25527
			2	3700000	6.5682
			3	3900000	6.59106
Planktonic Control	1	1	1	58000000	7.76343
			2	56000000	7.74819
			3	50000000	7.69897
		2	1	52000000	7.716
			2	58000000	7.76343
			3	52000000	7.716
	2	1	1	36000000	7.5563
			2	42000000	7.62325
			3	32000000	7.50515
		2	1	32000000	7.50515
			2	38000000	7.57978
			3	46000000	7.66276
	3	1	1	13200000	7.12057
			2	12000000	7.07918
			3	13500000	7.13033
		2	1	12300000	7.08991
			2	11000000	7.04139
			3	13000000	7.11394
Planktonic with antibiotic	1	1	1	400000	5.60206
			2	200000	5.30103
			3	400000	5.60206
		2	1	400000	5.60206
			2	400000	5.60206
			3	400000	5.60206
	2	1	1	80000	4.90309
			2	120000	5.07918
			3	60000	4.77815
		2	1	80000	4.90309
			2	140000	5.14613
			3	100000	5
	3	1	1	20000	4.30103
			2	27000	4.43136
			3	69000	4.83885
		2	1	290000	5.4624
			2	380000	5.57978
			3	41000	4.61278
