# Supplementary material for: Cells released from S. epidermidis biofilms present increased antibiotic tolerance to multiple antibiotics
Source: PeerJ. 2019 May 15;7:e6884. doi: 10.7717/peerj.6884 (PMC6525591; doi:10.7717/peerj.6884)
Supplement: Data S2 [file peerj-07-6884-s006.xlsx]

## Sheet: RP62A
Strain:	S. epidermidis RP62A		* Nd - Not detected
Antibiotic:	Vancomycin
Exposure time:	2 hours
CFU counting
Sample	Assay #	Biological replicate #	Technical replicate #	CFU/mL	Log CFU/mL
Biofilm Control	1	1	1	20000000	7.30103
			2	22000000	7.34242
			3	28000000	Nd
		2	1	20000000	7.30103
			2	20000000	7.30103
			3	24000000	7.38021
	2	1	1	10000000	7
			2	8000000	6.90309
			3	Nd	Nd
		2	1	8000000	6.90309
			2	12000000	7.07918
			3	Nd	Nd
	3	1	1	6000000	6.77815
			2	10000000	7
			3	Nd	Nd
		2	1	6000000	6.77815
			2	8000000	6.90309
			3	Nd	Nd
Biofilm with antibiotic	1	1	1	6000000	6.77815
			2	6000000	6.77815
			3	5000000	Nd
		2	1	4800000	6.68124
			2	5000000	6.69897
			3	4400000	6.64345
	2	1	1	2000000	6.30103
			2	2000000	6.30103
			3	3000000	6.47712
		2	1	3200000	6.50515
			2	3000000	6.47712
			3	4000000	6.60206
	3	1	1	1800000	6.25527
			2	2400000	6.38021
			3	1400000	6.14613
		2	1	2000000	6.30103
			2	2000000	6.30103
			3	2000000	6.30103
BRC Control	1	1	1	18000000	7.25527
			2	22000000	7.34242
			3	14000000	7.14613
		2	1	16000000	7.20412
			2	20000000	7.30103
			3	20000000	7.30103
	2	1	1	14000000	7.14613
			2	6000000	6.77815
			3	20000000	7.30103
		2	1	10000000	7
			2	6000000	6.77815
			3	Nd	Nd
	3	1	1	10000000	7
			2	6000000	6.77815
			3	20000000	7.30103
		2	1	8000000	6.90309
			2	14000000	7.14613
			3	Nd	Nd
BRC with antibiotic	1	1	1	3600000	6.5563
			2	3400000	6.53148
			3	3600000	6.5563
		2	1	2400000	6.38021
			2	4000000	6.60206
			3	4000000	6.60206
	2	1	1	2400000	6.38021
			2	1600000	6.20412
			3	4000000	6.60206
		2	1	3200000	6.50515
			2	1600000	6.20412
			3	2000000	6.30103
	3	1	1	3400000	6.53148
			2	4000000	6.60206
			3	3000000	6.47712
		2	1	3800000	6.57978
			2	2000000	6.30103
			3	4000000	6.60206
Planktonic Control	1	1	1	6200000	6.79239
			2	4000000	6.60206
			3	5200000	6.716
		2	1	3800000	6.57978
			2	6000000	6.77815
			3	2000000	6.30103
	2	1	1	30000000	7.47712
			2	30000000	7.47712
			3	20000000	7.30103
		2	1	20000000	7.30103
			2	20000000	7.30103
			3	40000000	7.60206
	3	1	1	34000000	7.53148
			2	20000000	7.30103
			3	24000000	7.38021
		2	1	32000000	7.50515
			2	20000000	7.30103
			3	40000000	Nd
Planktonic with antibiotic	1	1	1	460000	5.66276
			2	480000	5.68124
			3	580000	5.76343
		2	1	520000	5.716
			2	600000	5.77815
			3	400000	5.60206
	2	1	1	1600000	6.20412
			2	1400000	6.14613
			3	2000000	6.30103
		2	1	1200000	6.07918
			2	1200000	6.07918
			3	2000000	6.30103
	3	1	1	3000000	6.47712
			2	2600000	6.41497
			3	1800000	6.25527
		2	1	2800000	6.44716
			2	2000000	6.30103
			3	4000000	Nd

## Sheet: 9142
Strain:	S. epidermidis 9142		* Nd - Not detected
Antibiotic:	Vancomycin
Exposure time:	2 hours
CFU counting
Sample	Assay #	Biological replicate #	Technical replicate #	CFU/mL	Log CFU/mL
Biofilm Control	1	1	1	8000000	6.90309
			2	4000000	6.60206
			3	10000000	7
		2	1	12000000	7.07918
			2	6000000	6.77815
			3	12000000	7.07918
	2	1	1	12000000	7.07918
			2	10000000	7
			3	16000000	7.20412
		2	1	14000000	7.14613
			2	12000000	7.07918
			3	16000000	7.20412
	3	1	1	14000000	7.14613
			2	10000000	7
			3	6000000	6.77815
		2	1	6400000	6.80618
			2	19000000	7.27875
			3	18500000	7.26717
Biofilm with antibiotic	1	1	1	900000	5.95424
			2	1100000	6.04139
			3	Nd	Nd
		2	1	8000000	6.90309
			2	8000000	6.90309
			3	2000000	6.30103
	2	1	1	8000000	6.90309
			2	6000000	6.77815
			3	6000000	6.77815
		2	1	6000000	6.77815
			2	6000000	6.77815
			3	8000000	6.90309
	3	1	1	2250000	6.35218
			2	4700000	6.6721
			3	2600000	6.41497
		2	1	2600000	6.41497
			2	3050000	6.4843
			3	3100000	6.49136
BRC Control	1	1	1	16000000	7.20412
			2	16000000	7.20412
			3	18000000	7.25527
		2	1	6000000	6.77815
			2	4000000	6.60206
			3	12000000	7.07918
	2	1	1	16000000	7.20412
			2	22000000	7.34242
			3	20000000	7.30103
		2	1	12000000	7.07918
			2	14000000	7.14613
			3	20000000	7.30103
	3	1	1	23000000	7.36173
			2	26000000	7.41497
			3	23000000	7.36173
		2	1	10000000	7
			2	26000000	7.41497
			3	24500000	7.38917
BRC with antibiotic	1	1	1	2000000	6.30103
			2	4000000	6.60206
			3	6000000	6.77815
		2	1	2000000	6.30103
			2	5000000	6.69897
			3	3000000	6.47712
	2	1	1	4000000	6.60206
			2	6000000	6.77815
			3	4000000	6.60206
		2	1	4000000	6.60206
			2	6000000	6.77815
			3	4000000	6.60206
	3	1	1	4700000	6.6721
			2	1100000	6.04139
			3	5300000	6.72428
		2	1	5200000	6.716
			2	5650000	6.75205
			3	5950000	6.77452
Planktonic Control	1	1	1	28000000	7.44716
			2	30000000	7.47712
			3	26000000	7.41497
		2	1	16000000	7.20412
			2	24000000	7.38021
			3	30000000	7.47712
	2	1	1	2400000	6.38021
			2	2400000	6.38021
			3	2200000	6.34242
		2	1	2000000	6.30103
			2	1800000	6.25527
			3	2600000	6.41497
	3	1	1	12000000	7.07918
			2	19500000	7.29003
			3	10500000	7.02119
		2	1	40500000	7.60746
			2	23500000	7.37107
			3	Nd	Nd
Planktonic with antibiotic	1	1	1	700000	5.8451
			2	600000	5.77815
			3	700000	5.8451
		2	1	800000	5.90309
			2	700000	5.8451
			3	500000	5.69897
	2	1	1	400000	5.60206
			2	800000	5.90309
			3	600000	5.77815
		2	1	600000	5.77815
			2	600000	5.77815
			3	1000000	6
	3	1	1	1950000	6.29003
			2	1950000	6.29003
			3	2450000	6.38917
		2	1	3750000	6.57403
			2	3530000	6.54777
			3	Nd	Nd

## Sheet: IE186
Strain:	S. epidermidis IE186		* Nd - Not detected
Antibiotic:	Vancomycin
Exposure time:	2 hours
CFU counting
Sample	Assay #	Biological replicate #	Technical replicate #	CFU/mL	Log CFU/mL
Biofilm Control	1	1	1	3200000	6.50515
			2	3600000	6.5563
			3	3800000	6.57978
		2	1	4800000	6.68124
			2	4200000	6.62325
			3	4400000	6.64345
	2	1	1	2800000	6.44716
			2	3400000	6.53148
			3	3200000	6.50515
		2	1	4200000	6.62325
			2	4400000	6.64345
			3	4400000	6.64345
	3	1	1	4000000	6.60206
			2	3600000	6.5563
			3	4600000	6.66276
		2	1	4600000	6.66276
			2	5200000	6.716
			3	5400000	6.73239
Biofilm with antibiotic	1	1	1	1600000	6.20412
			2	2800000	6.44716
			3	1800000	6.25527
		2	1	2600000	6.41497
			2	3200000	6.50515
			3	3000000	6.47712
	2	1	1	1600000	6.20412
			2	2400000	6.38021
			3	2200000	6.34242
		2	1	2400000	6.38021
			2	2600000	6.41497
			3	2000000	6.30103
	3	1	1	2200000	6.34242
			2	2400000	6.38021
			3	2400000	6.38021
		2	1	2400000	6.38021
			2	2600000	6.41497
			3	3200000	6.50515
BRC Control	1	1	1	2000000	6.30103
			2	3200000	6.50515
			3	2600000	6.41497
		2	1	1800000	6.25527
			2	1800000	6.25527
			3	1400000	6.14613
	2	1	1	14000000	7.14613
			2	8000000	6.90309
			3	6000000	6.77815
		2	1	12000000	7.07918
			2	12000000	7.07918
			3	8000000	6.90309
	3	1	1	6000000	6.77815
			2	14000000	7.14613
			3	14000000	7.14613
		2	1	6000000	6.77815
			2	8000000	6.90309
			3	10000000	7
BRC with antibiotic	1	1	1	1000000	6
			2	1200000	6.07918
			3	1200000	6.07918
		2	1	1000000	6
			2	1000000	6
			3	1000000	6
	2	1	1	3400000	6.53148
			2	3200000	6.50515
			3	3800000	6.57978
		2	1	4400000	6.64345
			2	4600000	6.66276
			3	3800000	6.57978
	3	1	1	4200000	6.62325
			2	4800000	6.68124
			3	4400000	6.64345
		2	1	4400000	6.64345
			2	3400000	6.53148
			3	3600000	6.5563
Planktonic Control	1	1	1	4000000	6.60206
			2	2800000	6.44716
			3	3200000	6.50515
		2	1	2600000	6.41497
			2	5000000	6.69897
			3	3000000	6.47712
	2	1	1	18000000	7.25527
			2	20000000	7.30103
			3	24000000	7.38021
		2	1	18000000	7.25527
			2	16000000	7.20412
			3	22000000	7.34242
	3	1	1	14000000	7.14613
			2	18000000	7.25527
			3	14000000	7.14613
		2	1	18000000	7.25527
			2	16000000	7.20412
			3	20000000	7.30103
Planktonic with antibiotic	1	1	1	120000	5.07918
			2	140000	5.14613
			3	100000	5
		2	1	80000	4.90309
			2	120000	5.07918
			3	120000	5.07918
	2	1	1	2400000	6.38021
			2	1600000	6.20412
			3	2200000	6.34242
		2	1	1800000	6.25527
			2	2200000	6.34242
			3	2000000	6.30103
	3	1	1	1400000	6.14613
			2	1000000	6
			3	1800000	6.25527
		2	1	1400000	6.14613
			2	1800000	6.25527
			3	1200000	6.07918

## Sheet: PT12003
Strain:	S. epidermidis PT12003		* Nd - Not detected
Antibiotic:	Vancomycin
Exposure time:	2 hours
CFU counting
Sample	Assay #	Biological replicate #	Technical replicate #	CFU/mL	Log CFU/mL
Biofilm Control	1	1	1	42000000	7.62325
			2	46000000	7.66276
			3	48000000	7.68124
		2	1	34000000	7.53148
			2	42000000	7.62325
			3	32000000	7.50515
	2	1	1	2000000	6.30103
			2	2200000	6.34242
			3	3800000	6.57978
		2	1	4200000	6.62325
			2	3400000	6.53148
			3	3000000	6.47712
	3	1	1	14000000	7.14613
			2	14000000	7.14613
			3	18000000	7.25527
		2	1	16000000	7.20412
			2	18000000	7.25527
			3	18000000	7.25527
Biofilm with antibiotic	1	1	1	26000000	7.41497
			2	22000000	7.34242
			3	38000000	7.57978
		2	1	22000000	7.34242
			2	28000000	7.44716
			3	18000000	7.25527
	2	1	1	1200000	6.07918
			2	1600000	6.20412
			3	1400000	6.14613
		2	1	2000000	6.30103
			2	1400000	6.14613
			3	1800000	6.25527
	3	1	1	12000000	7.07918
			2	12000000	7.07918
			3	10000000	7
		2	1	8000000	6.90309
			2	6000000	6.77815
			3	16000000	7.20412
BRC Control	1	1	1	60000000	7.77815
			2	80000000	7.90309
			3	80000000	7.90309
		2	1	80000000	7.90309
			2	60000000	7.77815
			3	120000000	8.07918
	2	1	1	36000000	7.5563
			2	38000000	7.57978
			3	40000000	7.60206
		2	1	24000000	7.38021
			2	24000000	7.38021
			3	26000000	7.41497
	3	1	1	16000000	7.20412
			2	18000000	7.25527
			3	14000000	7.14613
		2	1	12000000	7.07918
			2	16000000	7.20412
			3	14000000	7.14613
BRC with antibiotic	1	1	1	22000000	7.34242
			2	20000000	7.30103
			3	18000000	7.25527
		2	1	12000000	7.07918
			2	10000000	7
			3	18000000	7.25527
	2	1	1	14000000	7.14613
			2	20000000	7.30103
			3	26000000	7.41497
		2	1	6000000	6.77815
			2	6000000	6.77815
			3	8000000	6.90309
	3	1	1	4600000	6.66276
			2	3600000	6.5563
			3	5400000	6.73239
		2	1	4800000	6.68124
			2	4800000	6.68124
			3	4400000	6.64345
Planktonic Control	1	1	1	30000000	7.47712
			2	22000000	7.34242
			3	16000000	7.20412
		2	1	26000000	7.41497
			2	30000000	7.47712
			3	18000000	7.25527
	2	1	1	10000000	7
			2	14000000	7.14613
			3	12000000	7.07918
		2	1	20000000	7.30103
			2	22000000	7.34242
			3	20000000	7.30103
	3	1	1	32000000	7.50515
			2	30000000	7.47712
			3	24000000	7.38021
		2	1	16000000	7.20412
			2	20000000	7.30103
			3	20000000	7.30103
Planktonic with antibiotic	1	1	1	2200000	6.34242
			2	2200000	6.34242
			3	3400000	6.53148
		2	1	2600000	6.41497
			2	2200000	6.34242
			3	3000000	6.47712
	2	1	1	800000	5.90309
			2	1600000	6.20412
			3	2200000	6.34242
		2	1	1000000	6
			2	1200000	6.07918
			3	1200000	6.07918
	3	1	1	4000000	6.60206
			2	3600000	6.5563
			3	3800000	6.57978
		2	1	3400000	6.53148
			2	2800000	6.44716
			3	2800000	6.44716

## Sheet: 1457
Strain:	S. epidermidis 1457		* Nd - Not detected
Antibiotic:	Vancomycin
Exposure time:	2 hours
CFU counting
Sample	Assay #	Biological replicate #	Technical replicate #	CFU/mL	Log CFU/mL
Biofilm Control	1	1	1	18000000	7.25527
			2	8000000	6.90309
			3	20000000	7.30103
		2	1	20000000	7.30103
			2	24000000	7.38021
			3	Nd	Nd
	2	1	1	14000000	7.14613
			2	12000000	7.07918
			3	20000000	7.30103
		2	1	14000000	7.14613
			2	16000000	7.20412
			3	Nd	Nd
	3	1	1	50000000	7.69897
			2	46000000	7.66276
			3	34000000	7.53148
		2	1	34000000	7.53148
			2	20000000	7.30103
			3	40000000	7.60206
Biofilm with antibiotic	1	1	1	5200000	6.716
			2	5000000	6.69897
			3	4400000	6.64345
		2	1	4800000	6.68124
			2	4000000	6.60206
			3	6000000	6.77815
	2	1	1	4000000	6.60206
			2	5200000	6.716
			3	4600000	6.66276
		2	1	5600000	6.74819
			2	4000000	6.60206
			3	6000000	6.77815
	3	1	1	10000000	7
			2	12000000	7.07918
			3	Nd	Nd
		2	1	8000000	6.90309
			2	16000000	7.20412
			3	Nd	Nd
BRC Control	1	1	1	26000000	7.41497
			2	34000000	7.53148
			3	20000000	7.30103
		2	1	22000000	7.34242
			2	36000000	7.5563
			3	20000000	7.30103
	2	1	1	16000000	7.20412
			2	12000000	7.07918
			3	20000000	7.30103
		2	1	12000000	7.07918
			2	18000000	7.25527
			3	Nd	Nd
	3	1	1	58000000	7.76343
			2	56000000	7.74819
			3	44000000	7.64345
		2	1	50000000	7.69897
			2	40000000	7.60206
			3	60000000	7.77815
BRC with antibiotic	1	1	1	4800000	6.68124
			2	5800000	6.76343
			3	4000000	6.60206
		2	1	4400000	6.64345
			2	5600000	6.74819
			3	6000000	6.77815
	2	1	1	3600000	6.5563
			2	2800000	6.44716
			3	3400000	6.53148
		2	1	2600000	6.41497
			2	4000000	6.60206
			3	2000000	6.30103
	3	1	1	10000000	7
			2	18000000	7.25527
			3	20000000	7.30103
		2	1	12000000	7.07918
			2	10000000	7
			3	Nd	Nd
Planktonic Control	1	1	1	26000000	7.41497
			2	26000000	7.41497
			3	Nd	Nd
		2	1	48000000	7.68124
			2	34000000	7.53148
			3	Nd	Nd
	2	1	1	44000000	7.64345
			2	20000000	7.30103
			3	46000000	7.66276
		2	1	32000000	7.50515
			2	20000000	7.30103
			3	40000000	7.60206
	3	1	1	38000000	7.57978
			2	44000000	7.64345
			3	46000000	7.66276
		2	1	36000000	7.5563
			2	40000000	7.60206
			3	40000000	7.60206
Planktonic with antibiotic	1	1	1	2600000	6.41497
			2	4000000	6.60206
			3	4000000	6.60206
		2	1	2400000	6.38021
			2	3600000	6.5563
			3	2000000	6.30103
	2	1	1	5400000	6.73239
			2	4200000	6.62325
			3	4600000	6.66276
		2	1	5600000	6.74819
			2	4000000	6.60206
			3	6000000	6.77815
	3	1	1	4200000	6.62325
			2	5800000	6.76343
			3	6400000	6.80618
		2	1	6200000	6.79239
			2	6000000	6.77815
			3	4000000	6.60206

## Sheet: DEN69
Strain:	S. epidermidis DEN69		* Nd - Not detected
Antibiotic:	Vancomycin
Exposure time:	2 hours
CFU counting
Sample	Assay #	Biological replicate #	Technical replicate #	CFU/mL	Log CFU/mL
Biofilm Control	1	1	1	18000000	7.25527
			2	16000000	7.20412
			3	14000000	7.14613
		2	1	12000000	7.07918
			2	6000000	6.77815
			3	4000000	6.60206
	2	1	1	14000000	7.14613
			2	16000000	7.20412
			3	12000000	7.07918
		2	1	18000000	7.25527
			2	10000000	7
			3	16000000	7.20412
	3	1	1	6000000	6.77815
			2	10000000	7
			3	8000000	6.90309
		2	1	6000000	6.77815
			2	8000000	6.90309
			3	12000000	7.07918
Biofilm with antibiotic	1	1	1	5600000	6.74819
			2	5400000	6.73239
			3	5600000	6.74819
		2	1	5000000	6.69897
			2	5800000	6.76343
			3	5600000	6.74819
	2	1	1	10000000	7
			2	4000000	6.60206
			3	8000000	6.90309
		2	1	8000000	6.90309
			2	6000000	6.77815
			3	4000000	6.60206
	3	1	1	3800000	6.57978
			2	3000000	6.47712
			3	2800000	6.44716
		2	1	3600000	6.5563
			2	3200000	6.50515
			3	3800000	6.57978
BRC Control	1	1	1	30000000	7.47712
			2	20000000	7.30103
			3	28000000	7.44716
		2	1	38000000	7.57978
			2	36000000	7.5563
			3	28000000	7.44716
	2	1	1	38000000	7.57978
			2	28000000	7.44716
			3	40000000	7.60206
		2	1	34000000	7.53148
			2	20000000	7.30103
			3	36000000	7.5563
	3	1	1	12000000	7.07918
			2	10000000	7
			3	6000000	6.77815
		2	1	14000000	7.14613
			2	16000000	7.20412
			3	12000000	7.07918
BRC with antibiotic	1	1	1	6000000	6.77815
			2	6000000	6.77815
			3	4000000	6.60206
		2	1	6000000	6.77815
			2	4000000	6.60206
			3	6000000	6.77815
	2	1	1	5200000	6.716
			2	5800000	6.76343
			3	4600000	6.66276
		2	1	4800000	6.68124
			2	5200000	6.716
			3	4600000	6.66276
	3	1	1	2400000	6.38021
			2	3000000	6.47712
			3	2400000	6.38021
		2	1	2800000	6.44716
			2	3200000	6.50515
			3	3800000	6.57978
Planktonic Control	1	1	1	32000000	7.50515
			2	38000000	7.57978
			3	40000000	7.60206
		2	1	36000000	7.5563
			2	36000000	7.5563
			3	50000000	7.69897
	2	1	1	24000000	7.38021
			2	22000000	7.34242
			3	20000000	7.30103
		2	1	38000000	7.57978
			2	42000000	7.62325
			3	24000000	7.38021
	3	1	1	32000000	7.50515
			2	36000000	7.5563
			3	28000000	7.44716
		2	1	34000000	7.53148
			2	36000000	7.5563
			3	32000000	7.50515
Planktonic with antibiotic	1	1	1	6000000	6.77815
			2	2000000	6.30103
			3	4000000	6.60206
		2	1	4000000	6.60206
			2	2000000	6.30103
			3	4000000	6.60206
	2	1	1	2400000	6.38021
			2	2400000	6.38021
			3	2400000	6.38021
		2	1	2200000	6.34242
			2	2400000	6.38021
			3	1800000	6.25527
	3	1	1	2600000	6.41497
			2	2400000	6.38021
			3	2400000	6.38021
		2	1	2800000	6.44716
			2	3200000	6.50515
			3	2400000	6.38021

## Sheet: URU23
Strain:	S. epidermidis URU23		* Nd - Not detected
Antibiotic:	Vancomycin
Exposure time:	2 hours
CFU counting
Sample	Assay #	Biological replicate #	Technical replicate #	CFU/mL	Log CFU/mL
Biofilm Control	1	1	1	8000000	6.90309
			2	6000000	6.77815
			3	8000000	6.90309
		2	1	14000000	7.14613
			2	8000000	6.90309
			3	12000000	7.07918
	2	1	1	6000000	6.77815
			2	10000000	7
			3	8000000	6.90309
		2	1	14000000	7.14613
			2	12000000	7.07918
			3	16000000	7.20412
	3	1	1	18000000	7.25527
			2	10000000	7
			3	18000000	7.25527
		2	1	24000000	7.38021
			2	14000000	7.14613
			3	12000000	7.07918
Biofilm with antibiotic	1	1	1	5600000	6.74819
			2	4400000	6.64345
			3	4200000	6.62325
		2	1	5000000	6.69897
			2	5000000	6.69897
			3	4800000	6.68124
	2	1	1	2000000	6.30103
			2	2800000	6.44716
			3	3200000	6.50515
		2	1	2200000	6.34242
			2	2800000	6.44716
			3	2800000	6.44716
	3	1	1	5600000	6.74819
			2	4600000	6.66276
			3	5200000	6.716
		2	1	4000000	6.60206
			2	4800000	6.68124
			3	5000000	6.69897
BRC Control	1	1	1	16000000	7.20412
			2	16000000	7.20412
			3	20000000	7.30103
		2	1	8000000	6.90309
			2	16000000	7.20412
			3	12000000	7.07918
	2	1	1	14000000	7.14613
			2	18000000	7.25527
			3	10000000	7
		2	1	10000000	7
			2	12000000	7.07918
			3	6000000	6.77815
	3	1	1	6000000	6.77815
			2	12000000	7.07918
			3	14000000	7.14613
		2	1	6000000	6.77815
			2	14000000	7.14613
			3	8000000	6.90309
BRC with antibiotic	1	1	1	3600000	6.5563
			2	3800000	6.57978
			3	5000000	6.69897
		2	1	3400000	6.53148
			2	2800000	6.44716
			3	3400000	6.53148
	2	1	1	2400000	6.38021
			2	2600000	6.41497
			3	2400000	6.38021
		2	1	2400000	6.38021
			2	3200000	6.50515
			3	2800000	6.44716
	3	1	1	2800000	6.44716
			2	3400000	6.53148
			3	3600000	6.5563
		2	1	2600000	6.41497
			2	3200000	6.50515
			3	2000000	6.30103
Planktonic Control	1	1	1	28000000	7.44716
			2	30000000	7.47712
			3	30000000	7.47712
		2	1	24000000	7.38021
			2	30000000	7.47712
			3	26000000	7.41497
	2	1	1	28000000	7.44716
			2	26000000	7.41497
			3	34000000	7.53148
		2	1	20000000	7.30103
			2	30000000	7.47712
			3	32000000	7.50515
	3	1	1	28000000	7.44716
			2	30000000	7.47712
			3	32000000	7.50515
		2	1	24000000	7.38021
			2	32000000	7.50515
			3	26000000	7.41497
Planktonic with antibiotic	1	1	1	3800000	6.57978
			2	2000000	6.30103
			3	2000000	6.30103
		2	1	2200000	6.34242
			2	2200000	6.34242
			3	2600000	6.41497
	2	1	1	2000000	6.30103
			2	6000000	6.77815
			3	2000000	6.30103
		2	1	4000000	6.60206
			2	4000000	6.60206
			3	2000000	6.30103
	3	1	1	3200000	6.50515
			2	2800000	6.44716
			3	3600000	6.5563
		2	1	4000000	6.60206
			2	3800000	6.57978
			3	3600000	6.5563

## Sheet: IE214
Strain:	S. epidermidis IE214		* Nd - Not detected
Antibiotic:	Vancomycin
Exposure time:	2 hours
CFU counting
Sample	Assay #	Biological replicate #	Technical replicate #	CFU/mL	Log CFU/mL
Biofilm Control	1	1	1	8000000	6.90309
			2	20000000	7.30103
			3	Nd	Nd
		2	1	10000000	7
			2	18000000	7.25527
			3	Nd	Nd
	2	1	1	18000000	7.25527
			2	24000000	7.38021
			3	12000000	7.07918
		2	1	18000000	7.25527
			2	20000000	7.30103
			3	20000000	7.30103
	3	1	1	26000000	7.41497
			2	12000000	7.07918
			3	16000000	7.20412
		2	1	6000000	6.77815
			2	20000000	7.30103
			3	20000000	7.30103
Biofilm with antibiotic	1	1	1	3000000	6.47712
			2	3600000	6.5563
			3	2800000	6.44716
		2	1	3000000	6.47712
			2	2000000	6.30103
			3	4000000	6.60206
	2	1	1	4000000	6.60206
			2	4400000	6.64345
			3	2600000	6.41497
		2	1	2600000	6.41497
			2	2000000	6.30103
			3	4000000	6.60206
	3	1	1	6000000	6.77815
			2	5200000	6.716
			3	5800000	6.76343
		2	1	6200000	6.79239
			2	6000000	6.77815
			3	4000000	6.60206
BRC Control	1	1	1	18000000	7.25527
			2	14000000	7.14613
			3	22000000	7.34242
		2	1	14000000	7.14613
			2	20000000	7.30103
			3	20000000	7.30103
	2	1	1	5800000	6.76343
			2	4600000	6.66276
			3	3800000	6.57978
		2	1	5400000	6.73239
			2	4000000	6.60206
			3	6000000	6.77815
	3	1	1	18000000	7.25527
			2	18000000	7.25527
			3	20000000	7.30103
		2	1	10000000	7
			2	24000000	7.38021
			3	Nd	Nd
BRC with antibiotic	1	1	1	5800000	6.76343
			2	6200000	6.79239
			3	5800000	6.76343
		2	1	6400000	6.80618
			2	6000000	6.77815
			3	4000000	6.60206
	2	1	1	3200000	6.50515
			2	3800000	6.57978
			3	2000000	6.30103
		2	1	1000000	6
			2	4000000	6.60206
			3	2000000	6.30103
	3	1	1	6200000	6.79239
			2	4800000	6.68124
			3	6000000	6.77815
		2	1	6000000	6.77815
			2	2000000	6.30103
			3	8000000	6.90309
Planktonic Control	1	1	1	50000000	7.69897
			2	54000000	7.73239
			3	42000000	7.62325
		2	1	44000000	7.64345
			2	60000000	7.77815
			3	40000000	7.60206
	2	1	1	16000000	7.20412
			2	10000000	7
			3	20000000	7.30103
		2	1	12000000	7.07918
			2	14000000	7.14613
			3	Nd	Nd
	3	1	1	28000000	7.44716
			2	32000000	7.50515
			3	26000000	7.41497
		2	1	42000000	7.62325
			2	20000000	7.30103
			3	40000000	7.60206
Planktonic with antibiotic	1	1	1	5000000	6.69897
			2	4400000	6.64345
			3	4200000	6.62325
		2	1	3200000	6.50515
			2	4000000	6.60206
			3	4000000	6.60206
	2	1	1	3800000	6.57978
			2	3000000	6.47712
			3	4000000	6.60206
		2	1	2600000	6.41497
			2	4000000	6.60206
			3	2000000	6.30103
	3	1	1	3200000	6.50515
			2	2200000	6.34242
			3	3200000	6.50515
		2	1	3000000	6.47712
			2	2000000	6.30103
			3	4000000	6.60206

## Sheet: PT130132
Strain:	S. epidermidis PT130132		* Nd - Not detected
Antibiotic:	Vancomycin
Exposure time:	2 hours
CFU counting
Sample	Assay #	Biological replicate #	Technical replicate #	CFU/mL	Log CFU/mL
Biofilm Control	1	1	1	26000000	7.41497
			2	30000000	7.47712
			3	18000000	7.25527
		2	1	28000000	7.44716
			2	40000000	7.60206
			3	20000000	7.30103
	2	1	1	8000000	6.90309
			2	10000000	7
			3	Nd	Nd
		2	1	16000000	7.20412
			2	6000000	6.77815
			3	Nd	Nd
	3	1	1	8000000	6.90309
			2	20000000	7.30103
			3	18000000	7.25527
		2	1	24000000	7.38021
			2	20000000	7.30103
			3	20000000	7.30103
Biofilm with antibiotic	1	1	1	5800000	6.76343
			2	5400000	6.73239
			3	4000000	6.60206
		2	1	5000000	6.69897
			2	6000000	6.77815
			3	4000000	6.60206
	2	1	1	4000000	6.60206
			2	4200000	6.62325
			3	3400000	6.53148
		2	1	3000000	6.47712
			2	2000000	6.30103
			3	4000000	6.60206
	3	1	1	3800000	6.57978
			2	3400000	6.53148
			3	4000000	6.60206
		2	1	4200000	6.62325
			2	2000000	6.30103
			3	4000000	6.60206
BRC Control	1	1	1	34000000	7.53148
			2	44000000	7.64345
			3	22000000	7.34242
		2	1	28000000	7.44716
			2	40000000	7.60206
			3	40000000	7.60206
	2	1	1	4200000	6.62325
			2	4000000	6.60206
			3	4400000	6.64345
		2	1	4800000	6.68124
			2	4000000	6.60206
			3	6000000	6.77815
	3	1	1	28000000	7.44716
			2	26000000	7.41497
			3	20000000	7.30103
		2	1	22000000	7.34242
			2	30000000	7.47712
			3	Nd	Nd
BRC with antibiotic	1	1	1	2000000	6.30103
			2	3200000	6.50515
			3	3400000	6.53148
		2	1	3400000	6.53148
			2	4000000	6.60206
			3	2000000	6.30103
	2	1	1	1600000	6.20412
			2	1000000	6
			3	Nd	Nd
		2	1	800000	5.90309
			2	1800000	6.25527
			3	Nd	Nd
	3	1	1	3600000	6.5563
			2	4000000	6.60206
			3	3200000	6.50515
		2	1	3800000	6.57978
			2	4000000	6.60206
			3	4000000	6.60206
Planktonic Control	1	1	1	18000000	7.25527
			2	10000000	7
			3	18000000	7.25527
		2	1	22000000	7.34242
			2	20000000	7.30103
			3	20000000	7.30103
	2	1	1	14000000	7.14613
			2	6000000	6.77815
			3	Nd	Nd
		2	1	14000000	7.14613
			2	12000000	7.07918
			3	Nd	Nd
	3	1	1	18000000	7.25527
			2	14000000	7.14613
			3	20000000	7.30103
		2	1	26000000	7.41497
			2	16000000	7.20412
			3	Nd	Nd
Planktonic with antibiotic	1	1	1	2200000	6.34242
			2	3200000	6.50515
			3	2800000	6.44716
		2	1	2800000	6.44716
			2	2000000	6.30103
			3	4000000	6.60206
	2	1	1	1400000	6.14613
			2	1600000	6.20412
			3	1600000	6.20412
		2	1	400000	5.60206
			2	2000000	6.30103
			3	2000000	6.30103
	3	1	1	2600000	6.41497
			2	2200000	6.34242
			3	2400000	6.38021
		2	1	2400000	6.38021
			2	2000000	6.30103
			3	4000000	6.60206

## Sheet: ICE09
Strain:	S. epidermidis ICE09		* Nd - Not detected
Antibiotic:	Vancomycin
Exposure time:	2 hours
CFU counting
Sample	Assay #	Biological replicate #	Technical replicate #	CFU/mL	Log CFU/mL
Biofilm Control	1	1	1	12000000	7.07918
			2	10000000	7
			3	4000000	6.60206
		2	1	10000000	7
			2	8000000	6.90309
			3	12000000	7.07918
	2	1	1	16000000	7.20412
			2	16000000	7.20412
			3	12000000	7.07918
		2	1	10000000	7
			2	12000000	7.07918
			3	8000000	6.90309
	3	1	1	14000000	7.14613
			2	16000000	7.20412
			3	12000000	7.07918
		2	1	18000000	7.25527
			2	18000000	7.25527
			3	14000000	7.14613
Biofilm with antibiotic	1	1	1	2000000	6.30103
			2	1800000	6.25527
			3	2400000	6.38021
		2	1	2200000	6.34242
			2	2000000	6.30103
			3	1800000	6.25527
	2	1	1	2400000	6.38021
			2	1800000	6.25527
			3	2200000	6.34242
		2	1	2200000	6.34242
			2	1800000	6.25527
			3	1600000	6.20412
	3	1	1	4000000	6.60206
			2	4000000	6.60206
			3	2000000	6.30103
		2	1	2000000	6.30103
			2	6000000	6.77815
			3	2000000	6.30103
BRC Control	1	1	1	4000000	6.60206
			2	8000000	6.90309
			3	6000000	6.77815
		2	1	6000000	6.77815
			2	6000000	6.77815
			3	4000000	6.60206
	2	1	1	8000000	6.90309
			2	10000000	7
			3	12000000	7.07918
		2	1	12000000	7.07918
			2	14000000	7.14613
			3	14000000	7.14613
	3	1	1	16000000	7.20412
			2	6000000	6.77815
			3	16000000	7.20412
		2	1	6000000	6.77815
			2	10000000	7
			3	12000000	7.07918
BRC with antibiotic	1	1	1	800000	5.90309
			2	800000	5.90309
			3	1000000	6
		2	1	1000000	6
			2	1200000	6.07918
			3	600000	5.77815
	2	1	1	2200000	6.34242
			2	2400000	6.38021
			3	1800000	6.25527
		2	1	2000000	6.30103
			2	2800000	6.44716
			3	2600000	6.41497
	3	1	1	3200000	6.50515
			2	3200000	6.50515
			3	2200000	6.34242
		2	1	2200000	6.34242
			2	2800000	6.44716
			3	2600000	6.41497
Planktonic Control	1	1	1	20000000	7.30103
			2	20000000	7.30103
			3	28000000	7.44716
		2	1	18000000	7.25527
			2	20000000	7.30103
			3	24000000	7.38021
	2	1	1	18000000	7.25527
			2	18000000	7.25527
			3	26000000	7.41497
		2	1	28000000	7.44716
			2	30000000	7.47712
			3	16000000	7.20412
	3	1	1	28000000	7.44716
			2	26000000	7.41497
			3	24000000	7.38021
		2	1	22000000	7.34242
			2	30000000	7.47712
			3	26000000	7.41497
Planktonic with antibiotic	1	1	1	2000000	6.30103
			2	1600000	6.20412
			3	1800000	6.25527
		2	1	2200000	6.34242
			2	2400000	6.38021
			3	1600000	6.20412
	2	1	1	1400000	6.14613
			2	1800000	6.25527
			3	1400000	6.14613
		2	1	2800000	6.44716
			2	3000000	6.47712
			3	3800000	6.57978
	3	1	1	2200000	6.34242
			2	1800000	6.25527
			3	1000000	6
		2	1	2000000	6.30103
			2	3200000	6.50515
			3	2000000	6.30103

[truncated: 1 more sheets: MEX60]
