# Supplementary material for: Cells released from S. epidermidis biofilms present increased antibiotic tolerance to multiple antibiotics
Source: PeerJ. 2019 May 15;7:e6884. doi: 10.7717/peerj.6884 (PMC6525591; doi:10.7717/peerj.6884)
Supplement: Supplemental Information 1 [file peerj-07-6884-s007.xlsx]

## Sheet: Vancomycin 6H
Strain:	S. epidermidis 9142		* Nd - Not detected
Antibiotic:	Vancomycin
Exposure time:	6 hours
CFU counting
Sample	Assay #	Biological replicate #	Technical replicate #	CFU/mL	Log CFU/mL
Biofilm Control	1	1	1	4000000	6.60206
			2	2000000	6.30103
			3	2000000	6.30103
		2	1	900000	5.95424
			2	110000	5.04139
			3	2000000	6.30103
	2	1	1	28000000	7.44716
			2	30000000	7.47712
			3	18000000	7.25527
		2	1	26000000	7.41497
			2	32000000	7.50515
			3	22000000	7.34242
	3	1	1	195000000	8.29003
			2	170000000	8.23045
			3	83000000	7.91908
		2	1	150000000	8.17609
			2	205000000	8.31175
			3	500000000	8.69897
Biofilm with antibiotic	1	1	1	500000	5.69897
			2	300000	5.47712
			3	450000	5.65321
		2	1	300000	5.47712
			2	200000	5.30103
			3	250000	5.39794
	2	1	1	400000	5.60206
			2	200000	5.30103
			3	600000	5.77815
		2	1	800000	5.90309
			2	400000	5.60206
			3	200000	5.30103
	3	1	1	42000	4.62325
			2	180000	5.25527
			3	130000	5.11394
		2	1	350000	5.54407
			2	50500	4.70329
			3	100000	5
BRC Control	1	1	1	60000000	7.77815
			2	48000000	7.68124
			3	Nd	Nd
		2	1	46000000	7.66276
			2	50000000	7.69897
			3	Nd	Nd
	2	1	1	180000000	8.25527
			2	160000000	8.20412
			3	220000000	8.34242
		2	1	200000000	8.30103
			2	180000000	8.25527
			3	240000000	8.38021
	3	1	1	12550000	7.09864
			2	13000000	7.11394
			3	10000000	7
		2	1	9100000	6.95904
			2	11500000	7.0607
			3	8300000	6.91908
BRC with antibiotic	1	1	1	600000	5.77815
			2	700000	5.8451
			3	700000	5.8451
		2	1	800000	5.90309
			2	1200000	6.07918
			3	2000000	6.30103
	2	1	1	400000	5.60206
			2	200000	5.30103
			3	600000	5.77815
		2	1	200000	5.30103
			2	400000	5.60206
			3	400000	5.60206
	3	1	1	49000	4.6902
			2	69000	4.83885
			3	130000	5.11394
		2	1	470000	5.6721
			2	54000	4.73239
			3	34500	4.53782
Planktonic Control	1	1	1	240000000	8.38021
			2	180000000	8.25527
			3	220000000	8.34242
		2	1	120000000	8.07918
			2	80000000	7.90309
			3	100000000	8
	2	1	1	40000000	7.60206
			2	80000000	7.90309
			3	40000000	7.60206
		2	1	80000000	7.90309
			2	120000000	8.07918
			3	60000000	7.77815
	3	1	1	255000000	8.40654
			2	220000000	8.34242
			3	100000000	8
		2	1	745000000	8.87216
			2	380000000	8.57978
			3	Nd	Nd
Planktonic with antibiotic	1	1	1	400000	5.60206
			2	700000	5.8451
			3	400000	5.60206
		2	1	500000	5.69897
			2	600000	5.77815
			3	400000	5.60206
	2	1	1	800000	5.90309
			2	800000	5.90309
			3	400000	5.60206
		2	1	200000	5.30103
			2	200000	5.30103
			3	600000	5.77815
	3	1	1	42000	4.62325
			2	155000	5.19033
			3	160000	5.20412
		2	1	320000	5.50515
			2	223000	5.3483
			3	Nd	Nd

## Sheet: Dicloxacillin 6H
Strain:	S. epidermidis 9142		* Nd - Not detected
Antibiotic:	Dicloxacillin
Exposure time:	6 hours
CFU counting
Sample	Assay #	Biological replicate #	Technical replicate #	CFU/mL	Log CFU/mL
Biofilm Control	1	1	1	60000000	7.77815
			2	80000000	7.90309
			3	60000000	7.77815
		2	1	120000000	8.07918
			2	100000000	8
			3	60000000	7.77815
	2	1	1	340000000	8.53148
			2	300000000	8.47712
			3	260000000	8.41497
		2	1	380000000	8.57978
			2	280000000	8.44716
			3	320000000	8.50515
	3	1	1	80000000	7.90309
			2	100000000	8
			3	40000000	7.60206
		2	1	60000000	7.77815
			2	60000000	7.77815
			3	100000000	8
	4	1	1	140000000	8.14613
			2	160000000	8.20412
			3	240000000	8.38021
		2	1	180000000	8.25527
			2	220000000	8.34242
			3	140000000	8.14613
	5	1	1	140000000	8.14613
			2	200000000	8.30103
			3	160000000	8.20412
		2	1	280000000	8.44716
			2	240000000	8.38021
			3	180000000	8.25527
Biofilm with antibiotic	1	1	1	800000	5.90309
			2	1000000	6
			3	1800000	6.25527
		2	1	1000000	6
			2	1400000	6.14613
			3	1200000	6.07918
	2	1	1	10000000	7
			2	4000000	6.60206
			3	6000000	6.77815
		2	1	6000000	6.77815
			2	4000000	6.60206
			3	8000000	6.90309
	3	1	1	1000000	6
			2	800000	5.90309
			3	1200000	6.07918
		2	1	600000	5.77815
			2	1000000	6
			3	1200000	6.07918
	4	1	1	1800000	6.25527
			2	2800000	6.44716
			3	2000000	6.30103
		2	1	2200000	6.34242
			2	2200000	6.34242
			3	2800000	6.44716
	5	1	1	2000000	6.30103
			2	4000000	6.60206
			3	2000000	6.30103
		2	1	2000000	6.30103
			2	2000000	6.30103
			3	4000000	6.60206
BRC Control	1	1	1	160000000	8.20412
			2	260000000	8.41497
			3	180000000	8.25527
		2	1	180000000	8.25527
			2	120000000	8.07918
			3	180000000	8.25527
	2	1	1	500000000	8.69897
			2	460000000	8.66276
			3	420000000	8.62325
		2	1	520000000	8.716
			2	440000000	8.64345
			3	420000000	8.62325
	3	1	1	160000000	8.20412
			2	100000000	8
			3	120000000	8.07918
		2	1	140000000	8.14613
			2	120000000	8.07918
			3	80000000	7.90309
	4	1	1	300000000	8.47712
			2	340000000	8.53148
			3	380000000	8.57978
		2	1	340000000	8.53148
			2	320000000	8.50515
			3	320000000	8.50515
	5	1	1	120000000	8.07918
			2	100000000	8
			3	100000000	8
		2	1	100000000	8
			2	120000000	8.07918
			3	60000000	7.77815
BRC with antibiotic	1	1	1	2600000	6.41497
			2	1800000	6.25527
			3	1400000	6.14613
		2	1	2200000	6.34242
			2	2800000	6.44716
			3	1800000	6.25527
	2	1	1	6000000	6.77815
			2	4000000	6.60206
			3	4000000	6.60206
		2	1	6000000	6.77815
			2	2000000	6.30103
			3	4000000	6.60206
	3	1	1	800000	5.90309
			2	1200000	6.07918
			3	1600000	6.20412
		2	1	1800000	6.25527
			2	1000000	6
			3	1400000	6.14613
	4	1	1	3600000	6.5563
			2	3000000	6.47712
			3	3800000	6.57978
		2	1	4600000	6.66276
			2	3800000	6.57978
			3	4200000	6.62325
	5	1	1	1400000	6.14613
			2	1000000	6
			3	600000	5.77815
		2	1	800000	5.90309
			2	1600000	6.20412
			3	1400000	6.14613
Planktonic Control	1	1	1	1200000000	9.07918
			2	2200000000	9.34242
			3	1600000000	9.20412
		2	1	1800000000	9.25527
			2	1400000000	9.14613
			3	2400000000	9.38021
	2	1	1	280000000	8.44716
			2	260000000	8.41497
			3	240000000	8.38021
		2	1	220000000	8.34242
			2	240000000	8.38021
			3	320000000	8.50515
	3	1	1	260000000	8.41497
			2	320000000	8.50515
			3	200000000	8.30103
		2	1	440000000	8.64345
			2	300000000	8.47712
			3	500000000	8.69897
	4	1	1	460000000	8.66276
			2	420000000	8.62325
			3	520000000	8.716
		2	1	480000000	8.68124
			2	440000000	8.64345
			3	540000000	8.73239
	5	1	1	620000000	8.79239
			2	600000000	8.77815
			3	580000000	8.76343
		2	1	520000000	8.716
			2	560000000	8.74819
			3	540000000	8.73239
Planktonic with antibiotic	1	1	1	60000000	7.77815
			2	40000000	7.60206
			3	20000000	7.30103
		2	1	40000000	7.60206
			2	40000000	7.60206
			3	100000000	8
	2	1	1	2000000	6.30103
			2	4000000	6.60206
			3	2000000	6.30103
		2	1	4000000	6.60206
			2	4000000	6.60206
			3	6000000	6.77815
	3	1	1	4000000	6.60206
			2	4000000	6.60206
			3	2000000	6.30103
		2	1	4000000	6.60206
			2	4000000	6.60206
			3	6000000	6.77815
	4	1	1	4000000	6.60206
			2	4000000	6.60206
			3	2000000	6.30103
		2	1	4000000	6.60206
			2	4000000	6.60206
			3	6000000	6.77815
	5	1	1	8000000	6.90309
			2	4000000	6.60206
			3	4000000	6.60206
		2	1	4000000	6.60206
			2	10000000	7
			3	6000000	6.77815

## Sheet: Teicoplanin 6H
Strain:	S. epidermidis 9142		* Nd - Not detected
Antibiotic:	Teicoplanin
Exposure time:	6 hours
CFU counting
Sample	Assay #	Biological replicate #	Technical replicate #	CFU/mL	Log CFU/mL
Biofilm Control	1	1	1	16000000	7.20412
			2	18000000	7.25527
			3	18000000	7.25527
		2	1	22000000	7.34242
			2	18000000	7.25527
			3	12000000	7.07918
	2	1	1	24000000	7.38021
			2	20000000	7.30103
			3	28000000	7.44716
		2	1	22000000	7.34242
			2	24000000	7.38021
			3	38000000	7.57978
	3	1	1	52000000	7.716
			2	50000000	7.69897
			3	60000000	7.77815
		2	1	50000000	7.69897
			2	46000000	7.66276
			3	58000000	7.76343
	4	1	1	28000000	7.44716
			2	34000000	7.53148
			3	46000000	7.66276
		2	1	44000000	7.64345
			2	28000000	7.44716
			3	30000000	7.47712
	5	1	1	12000000	7.07918
			2	10000000	7
			3	12000000	7.07918
		2	1	18000000	7.25527
			2	16000000	7.20412
			3	12000000	7.07918
Biofilm with antibiotic	1	1	1	140000	5.14613
			2	260000	5.41497
			3	240000	5.38021
		2	1	180000	5.25527
			2	180000	5.25527
			3	240000	5.38021
	2	1	1	400000	5.60206
			2	600000	5.77815
			3	400000	5.60206
		2	1	200000	5.30103
			2	200000	5.30103
			3	400000	5.60206
	3	1	1	1200000	6.07918
			2	1000000	6
			3	1200000	6.07918
		2	1	800000	5.90309
			2	400000	5.60206
			3	600000	5.77815
	4	1	1	400000	5.60206
			2	600000	5.77815
			3	400000	5.60206
		2	1	600000	5.77815
			2	400000	5.60206
			3	400000	5.60206
	5	1	1	140000	5.14613
			2	220000	5.34242
			3	160000	5.20412
		2	1	140000	5.14613
			2	140000	5.14613
			3	180000	5.25527
BRC Control	1	1	1	32000000	7.50515
			2	38000000	7.57978
			3	28000000	7.44716
		2	1	26000000	7.41497
			2	28000000	7.44716
			3	32000000	7.50515
	2	1	1	30000000	7.47712
			2	32000000	7.50515
			3	36000000	7.5563
		2	1	24000000	7.38021
			2	38000000	7.57978
			3	42000000	7.62325
	3	1	1	80000000	7.90309
			2	80000000	7.90309
			3	60000000	7.77815
		2	1	180000000	8.25527
			2	120000000	8.07918
			3	60000000	7.77815
	4	1	1	120000000	8.07918
			2	140000000	8.14613
			3	200000000	8.30103
		2	1	160000000	8.20412
			2	140000000	8.14613
			3	180000000	8.25527
	5	1	1	12000000	7.07918
			2	24000000	7.38021
			3	22000000	7.34242
		2	1	16000000	7.20412
			2	12000000	7.07918
			3	16000000	7.20412
BRC with antibiotic	1	1	1	140000	5.14613
			2	220000	5.34242
			3	140000	5.14613
		2	1	140000	5.14613
			2	160000	5.20412
			3	120000	5.07918
	2	1	1	80000	4.90309
			2	80000	4.90309
			3	40000	4.60206
		2	1	60000	4.77815
			2	100000	5
			3	120000	5.07918
	3	1	1	400000	5.60206
			2	400000	5.60206
			3	600000	5.77815
		2	1	400000	5.60206
			2	600000	5.77815
			3	800000	5.90309
	4	1	1	800000	5.90309
			2	1400000	6.14613
			3	1000000	6
		2	1	800000	5.90309
			2	200000	5.30103
			3	400000	5.60206
	5	1	1	140000	5.14613
			2	120000	5.07918
			3	160000	5.20412
		2	1	140000	5.14613
			2	180000	5.25527
			3	200000	5.30103
Planktonic Control	1	1	1	34000000	7.53148
			2	36000000	7.5563
			3	36000000	7.5563
		2	1	24000000	7.38021
			2	22000000	7.34242
			3	28000000	7.44716
	2	1	1	22000000	7.34242
			2	24000000	7.38021
			3	34000000	7.53148
		2	1	32000000	7.50515
			2	32000000	7.50515
			3	36000000	7.5563
	3	1	1	160000000	8.20412
			2	80000000	7.90309
			3	180000000	8.25527
		2	1	100000000	8
			2	160000000	8.20412
			3	160000000	8.20412
	4	1	1	120000000	8.07918
			2	80000000	7.90309
			3	120000000	8.07918
		2	1	180000000	8.25527
			2	180000000	8.25527
			3	220000000	8.34242
	5	1	1	20000000	7.30103
			2	14000000	7.14613
			3	8000000	6.90309
		2	1	14000000	7.14613
			2	16000000	7.20412
			3	12000000	7.07918
Planktonic with antibiotic	1	1	1	220000	5.34242
			2	320000	5.50515
			3	260000	5.41497
		2	1	300000	5.47712
			2	320000	5.50515
			3	240000	5.38021
	2	1	1	380000	5.57978
			2	320000	5.50515
			3	200000	5.30103
		2	1	320000	5.50515
			2	220000	5.34242
			3	260000	5.41497
	3	1	1	800000	5.90309
			2	1000000	6
			3	600000	5.77815
		2	1	800000	5.90309
			2	600000	5.77815
			3	600000	5.77815
	4	1	1	1200000	6.07918
			2	1000000	6
			3	1800000	6.25527
		2	1	1000000	6
			2	1400000	6.14613
			3	1600000	6.20412
	5	1	1	120000	5.07918
			2	60000	4.77815
			3	80000	4.90309
		2	1	60000	4.77815
			2	100000	5
			3	60000	4.77815

## Sheet: Ciprofloxacin 6H
Strain:	S. epidermidis 9142		* Nd - Not detected
Antibiotic:	Ciprofloxacin
Exposure time:	6 hours
CFU counting
Sample	Assay #	Biological replicate #	Technical replicate #	CFU/mL	Log CFU/mL
Biofilm Control	1	1	1	6000000	6.77815
			2	4000000	6.60206
			3	6000000	6.77815
		2	1	8000000	6.90309
			2	16000000	7.20412
			3	6000000	6.77815
	2	1	1	22000000	7.34242
			2	18000000	7.25527
			3	24000000	7.38021
		2	1	22000000	7.34242
			2	24000000	7.38021
			3	18000000	7.25527
	3	1	1	12000000	7.07918
			2	12000000	7.07918
			3	10000000	7
		2	1	10000000	7
			2	18000000	7.25527
			3	12000000	7.07918
Biofilm with antibiotic	1	1	1	3600000	6.5563
			2	3200000	6.50515
			3	2800000	6.44716
		2	1	1800000	6.25527
			2	2000000	6.30103
			3	2600000	6.41497
	2	1	1	6000000	6.77815
			2	2000000	6.30103
			3	10000000	7
		2	1	18000000	7.25527
			2	8000000	6.90309
			3	6000000	6.77815
	3	1	1	2000000	6.30103
			2	4000000	6.60206
			3	4000000	6.60206
		2	1	6000000	6.77815
			2	4000000	6.60206
			3	2000000	6.30103
BRC Control	1	1	1	14000000	7.14613
			2	10000000	7
			3	Nd	Nd
		2	1	12000000	7.07918
			2	18000000	7.25527
			3	18000000	7.25527
	2	1	1	Nd	Nd
			2	Nd	Nd
			3	Nd	Nd
		2	1	Nd	Nd
			2	Nd	Nd
			3	Nd	Nd
	3	1	1	12000000	7.07918
			2	24000000	7.38021
			3	22000000	7.34242
		2	1	16000000	7.20412
			2	12000000	7.07918
			3	16000000	7.20412
BRC with antibiotic	1	1	1	26000000	7.41497
			2	10000000	7
			3	10000000	7
		2	1	10000000	7
			2	8000000	6.90309
			3	16000000	7.20412
	2	1	1	Nd	Nd
			2	Nd	Nd
			3	Nd	Nd
		2	1	Nd	Nd
			2	Nd	Nd
			3	Nd	Nd
	3	1	1	12000000	7.07918
			2	10000000	7
			3	12000000	7.07918
		2	1	14000000	7.14613
			2	16000000	7.20412
			3	10000000	7
Planktonic Control	1	1	1	20000000	7.30103
			2	8000000	6.90309
			3	14000000	7.14613
		2	1	8000000	6.90309
			2	8000000	6.90309
			3	20000000	7.30103
	2	1	1	18000000	7.25527
			2	18000000	7.25527
			3	20000000	7.30103
		2	1	12000000	7.07918
			2	10000000	7
			3	8000000	6.90309
	3	1	1	16000000	7.20412
			2	12000000	7.07918
			3	8000000	6.90309
		2	1	14000000	7.14613
			2	16000000	7.20412
			3	20000000	7.30103
Planktonic with antibiotic	1	1	1	6000000	6.77815
			2	4000000	6.60206
			3	12000000	7.07918
		2	1	2000000	6.30103
			2	2000000	6.30103
			3	4000000	6.60206
	2	1	1	8000000	6.90309
			2	4000000	6.60206
			3	12000000	7.07918
		2	1	14000000	7.14613
			2	28000000	7.44716
			3	24000000	7.38021
	3	1	1	10000000	7
			2	4000000	6.60206
			3	6000000	6.77815
		2	1	8000000	6.90309
			2	6000000	6.77815
			3	4000000	6.60206

## Sheet: Rifampicin 6H
Strain:	S. epidermidis 9142		* Nd - Not detected
Antibiotic:	Rifampicin
Exposure time:	6 hours
CFU counting
Sample	Assay #	Biological replicate #	Technical replicate #	CFU/mL	Log CFU/mL
Biofilm Control	1	1	1	2200000	6.34242
			2	3200000	6.50515
			3	4400000	6.64345
		2	1	2400000	6.38021
			2	2600000	6.41497
			3	2200000	6.34242
	2	1	1	4000000	6.60206
			2	14000000	7.14613
			3	6000000	6.77815
		2	1	8000000	6.90309
			2	6000000	6.77815
			3	6000000	6.77815
	3	1	1	9500000	6.97772
			2	7400000	6.86923
			3	3000000	6.47712
		2	1	12500000	7.09691
			2	3900000	6.59106
			3	Nd	Nd
Biofilm with antibiotic	1	1	1	6000	3.77815
			2	2000	3.30103
			3	2000	3.30103
		2	1	6000	3.77815
			2	6000	3.77815
			3	6000	3.77815
	2	1	1	160000	5.20412
			2	60000	4.77815
			3	140000	5.14613
		2	1	160000	5.20412
			2	40000	4.60206
			3	120000	5.07918
	3	1	1	21000	4.32222
			2	44000	4.64345
			3	12200	4.08636
		2	1	11800	4.07188
			2	9250	3.96614
			3	Nd	Nd
BRC Control	1	1	1	1200000	6.07918
			2	1800000	6.25527
			3	1400000	6.14613
		2	1	Nd	Nd
			2	Nd	Nd
			3	Nd	Nd
	2	1	1	100000000	8
			2	6000000	6.77815
			3	6000000	6.77815
		2	1	60000000	7.77815
			2	100000000	8
			3	40000000	7.60206
	3	1	1	7200000	6.85733
			2	10500000	7.02119
			3	6550000	6.81624
		2	1	9500000	6.97772
			2	5800000	6.76343
			3	Nd	Nd
BRC with antibiotic	1	1	1	8000	3.90309
			2	18000	4.25527
			3	8000	3.90309
		2	1	14000	4.14613
			2	14000	4.14613
			3	8000	3.90309
	2	1	1	20000	4.30103
			2	12000	4.07918
			3	18000	4.25527
		2	1	12000	4.07918
			2	14000	4.14613
			3	14000	4.14613
	3	1	1	23500	4.37107
			2	85500	4.93197
			3	25000	4.39794
		2	1	76500	4.88366
			2	20500	4.31175
			3	Nd	Nd
Planktonic Control	1	1	1	400000	5.60206
			2	600000	5.77815
			3	1000000	6
		2	1	1400000	6.14613
			2	600000	5.77815
			3	1200000	6.07918
	2	1	1	100000000	8
			2	80000000	7.90309
			3	100000000	8
		2	1	160000000	8.20412
			2	180000000	8.25527
			3	80000000	7.90309
	3	1	1	9500000	6.97772
			2	16000000	7.20412
			3	7000000	6.8451
		2	1	6000000	6.77815
			2	9000000	6.95424
			3	Nd	Nd
Planktonic with antibiotic	1	1	1	4000	3.60206
			2	4000	3.60206
			3	4000	3.60206
		2	1	4000	3.60206
			2	14000	4.14613
			3	10000	4
	2	1	1	16000	4.20412
			2	16000	4.20412
			3	22000	4.34242
		2	1	22000	4.34242
			2	32000	4.50515
			3	34000	4.53148
	3	1	1	19000	4.27875
			2	6250	3.79588
			3	2150	3.33244
		2	1	73500	4.86629
			2	3500	3.54407
			3	Nd	Nd

## Sheet: Erythromycin 6H
Strain:	S. epidermidis 9142		* Nd - Not detected
Antibiotic:	Erythromycin
Exposure time:	6 hours
CFU counting
Sample	Assay #	Biological replicate #	Technical replicate #	CFU/mL	Log CFU/mL
Biofilm Control	1	1	1	16000000	7.20412
			2	14000000	7.14613
			3	10000000	7
		2	1	14000000	7.14613
			2	16000000	7.20412
			3	18000000	7.25527
	2	1	1	24000000	7.38021
			2	30000000	7.47712
			3	36000000	7.5563
		2	1	30000000	7.47712
			2	42000000	7.62325
			3	20000000	7.30103
	3	1	1	12000000	7.07918
			2	14000000	7.14613
			3	10000000	7
		2	1	8000000	6.90309
			2	12000000	7.07918
			3	8000000	6.90309
	4	1	1	42000000	7.62325
			2	40000000	7.60206
			3	42000000	7.62325
		2	1	34000000	7.53148
			2	28000000	7.44716
			3	32000000	7.50515
	5	1	1	4200000	6.62325
			2	4000000	6.60206
			3	4000000	6.60206
		2	1	3800000	6.57978
			2	4200000	6.62325
			3	5000000	6.69897
Biofilm with antibiotic	1	1	1	2000000	6.30103
			2	1800000	6.25527
			3	1200000	6.07918
		2	1	1000000	6
			2	1600000	6.20412
			3	1200000	6.07918
	2	1	1	1800000	6.25527
			2	3000000	6.47712
			3	3200000	6.50515
		2	1	2400000	6.38021
			2	3400000	6.53148
			3	2800000	6.44716
	3	1	1	2000000	6.30103
			2	1800000	6.25527
			3	1400000	6.14613
		2	1	1800000	6.25527
			2	1600000	6.20412
			3	1200000	6.07918
	4	1	1	4000000	6.60206
			2	4000000	6.60206
			3	6000000	6.77815
		2	1	4000000	6.60206
			2	6000000	6.77815
			3	6000000	6.77815
	5	1	1	400000	5.60206
			2	200000	5.30103
			3	400000	5.60206
		2	1	400000	5.60206
			2	400000	5.60206
			3	200000	5.30103
BRC Control	1	1	1	32000000	7.50515
			2	26000000	7.41497
			3	18000000	7.25527
		2	1	40000000	7.60206
			2	48000000	7.68124
			3	38000000	7.57978
	2	1	1	18000000	7.25527
			2	20000000	7.30103
			3	16000000	7.20412
		2	1	16000000	7.20412
			2	20000000	7.30103
			3	14000000	7.14613
	3	1	1	32000000	7.50515
			2	26000000	7.41497
			3	28000000	7.44716
		2	1	40000000	7.60206
			2	38000000	7.57978
			3	38000000	7.57978
	4	1	1	22000000	7.34242
			2	28000000	7.44716
			3	20000000	7.30103
		2	1	30000000	7.47712
			2	18000000	7.25527
			3	32000000	7.50515
	5	1	1	4400000	6.64345
			2	4600000	6.66276
			3	5000000	6.69897
		2	1	3800000	6.57978
			2	4200000	6.62325
			3	3600000	6.5563
BRC with antibiotic	1	1	1	4000000	6.60206
			2	4000000	6.60206
			3	6000000	6.77815
		2	1	6000000	6.77815
			2	4000000	6.60206
			3	2000000	6.30103
	2	1	1	4000000	6.60206
			2	2000000	6.30103
			3	2000000	6.30103
		2	1	2000000	6.30103
			2	4000000	6.60206
			3	2000000	6.30103
	3	1	1	4000000	6.60206
			2	4000000	6.60206
			3	6000000	6.77815
		2	1	4000000	6.60206
			2	4000000	6.60206
			3	6000000	6.77815
	4	1	1	4000000	6.60206
			2	4000000	6.60206
			3	4000000	6.60206
		2	1	2000000	6.30103
			2	4000000	6.60206
			3	4000000	6.60206
	5	1	1	400000	5.60206
			2	600000	5.77815
			3	400000	5.60206
		2	1	600000	5.77815
			2	400000	5.60206
			3	600000	5.77815
Planktonic Control	1	1	1	80000000	7.90309
			2	100000000	8
			3	120000000	8.07918
		2	1	100000000	8
			2	140000000	8.14613
			3	100000000	8
	2	1	1	32000000	7.50515
			2	28000000	7.44716
			3	24000000	7.38021
		2	1	32000000	7.50515
			2	24000000	7.38021
			3	38000000	7.57978
	3	1	1	52000000	7.716
			2	40000000	7.60206
			3	48000000	7.68124
		2	1	40000000	7.60206
			2	42000000	7.62325
			3	38000000	7.57978
	4	1	1	220000000	8.34242
			2	240000000	8.38021
			3	160000000	8.20412
		2	1	200000000	8.30103
			2	140000000	8.14613
			3	160000000	8.20412
	5	1	1	8000000	6.90309
			2	12000000	7.07918
			3	14000000	7.14613
		2	1	2000000	6.30103
			2	6000000	6.77815
			3	8000000	6.90309
Planktonic with antibiotic	1	1	1	4000000	6.60206
			2	2000000	6.30103
			3	2000000	6.30103
		2	1	2000000	6.30103
			2	4000000	6.60206
			3	2000000	6.30103
	2	1	1	1800000	6.25527
			2	2400000	6.38021
			3	2000000	6.30103
		2	1	1200000	6.07918
			2	2200000	6.34242
			3	2600000	6.41497
	3	1	1	600000	5.77815
			2	400000	5.60206
			3	600000	5.77815
		2	1	600000	5.77815
			2	600000	5.77815
			3	400000	5.60206
	4	1	1	4000000	6.60206
			2	2000000	6.30103
			3	4000000	6.60206
		2	1	4000000	6.60206
			2	4000000	6.60206
			3	4000000	6.60206
	5	1	1	120000	5.07918
			2	80000	4.90309
			3	120000	5.07918
		2	1	120000	5.07918
			2	80000	4.90309
			3	160000	5.20412

## Sheet: Gentamicin 6H
Strain:	S. epidermidis 9142		* Nd - Not detected
Antibiotic:	Gentamicin
Exposure time:	6 hours
CFU counting
Sample	Assay #	Biological replicate #	Technical replicate #	CFU/mL	Log CFU/mL
Biofilm Control	1	1	1	340000000	8.53148
			2	300000000	8.47712
			3	220000000	8.34242
		2	1	240000000	8.38021
			2	260000000	8.41497
			3	380000000	8.57978
	2	1	1	52000000	7.716
			2	56000000	7.74819
			3	48000000	7.68124
		2	1	44000000	7.64345
			2	58000000	7.76343
			3	60000000	7.77815
	3	1	1	100000000	8
			2	120000000	8.07918
			3	80000000	7.90309
		2	1	80000000	7.90309
			2	80000000	7.90309
			3	100000000	8
	4	1	1	56000000	7.74819
			2	52000000	7.716
			3	46000000	7.66276
		2	1	46000000	7.66276
			2	46000000	7.66276
			3	44000000	7.64345
	5	1	1	10000000	7
			2	8000000	6.90309
			3	10000000	7
		2	1	8000000	6.90309
			2	6000000	6.77815
			3	10000000	7
Biofilm with antibiotic	1	1	1	26000	4.41497
			2	26000	4.41497
			3	22000	4.34242
		2	1	32000	4.50515
			2	30000	4.47712
			3	24000	4.38021
	2	1	1	120000	5.07918
			2	140000	5.14613
			3	100000	5
		2	1	120000	5.07918
			2	120000	5.07918
			3	160000	5.20412
	3	1	1	400000	5.60206
			2	400000	5.60206
			3	600000	5.77815
		2	1	200000	5.30103
			2	400000	5.60206
			3	400000	5.60206
	4	1	1	40000	4.60206
			2	120000	5.07918
			3	140000	5.14613
		2	1	80000	4.90309
			2	120000	5.07918
			3	180000	5.25527
	5	1	1	10000	4
			2	8000	3.90309
			3	14000	4.14613
		2	1	10000	4
			2	10000	4
			3	12000	4.07918
BRC Control	1	1	1	240000000	8.38021
			2	280000000	8.44716
			3	260000000	8.41497
		2	1	400000000	8.60206
			2	380000000	8.57978
			3	340000000	8.53148
	2	1	1	580000000	8.76343
			2	52000000	7.716
			3	50000000	7.69897
		2	1	540000000	8.73239
			2	400000000	8.60206
			3	480000000	8.68124
	3	1	1	320000000	8.50515
			2	32000000	7.50515
			3	30000000	7.47712
		2	1	420000000	8.62325
			2	360000000	8.5563
			3	460000000	8.66276
	4	1	1	300000000	8.47712
			2	34000000	7.53148
			3	38000000	7.57978
		2	1	140000000	8.14613
			2	120000000	8.07918
			3	120000000	8.07918
	5	1	1	100000000	8
			2	10000000	7
			3	8000000	6.90309
		2	1	80000000	7.90309
			2	60000000	7.77815
			3	100000000	8
BRC with antibiotic	1	1	1	10000	4
			2	16000	4.20412
			3	14000	4.14613
		2	1	12000	4.07918
			2	18000	4.25527
			3	10000	4
	2	1	1	120000	5.07918
			2	140000	5.14613
			3	60000	4.77815
		2	1	100000	5
			2	60000	4.77815
			3	80000	4.90309
	3	1	1	120000	5.07918
			2	100000	5
			3	60000	4.77815
		2	1	40000	4.60206
			2	60000	4.77815
			3	80000	4.90309
	4	1	1	22000	4.34242
			2	20000	4.30103
			3	14000	4.14613
		2	1	16000	4.20412
			2	12000	4.07918
			3	18000	4.25527
	5	1	1	4000	3.60206
			2	2000	3.30103
			3	4000	3.60206
		2	1	4000	3.60206
			2	4000	3.60206
			3	4000	3.60206
Planktonic Control	1	1	1	280000000	8.44716
			2	240000000	8.38021
			3	300000000	8.47712
		2	1	280000000	8.44716
			2	260000000	8.41497
			3	240000000	8.38021
	2	1	1	480000000	8.68124
			2	480000000	8.68124
			3	460000000	8.66276
		2	1	480000000	8.68124
			2	540000000	8.73239
			3	500000000	8.69897
	3	1	1	360000000	8.5563
			2	360000000	8.5563
			3	460000000	8.66276
		2	1	280000000	8.44716
			2	300000000	8.47712
			3	280000000	8.44716
	4	1	1	60000000	7.77815
			2	58000000	7.76343
			3	56000000	7.74819
		2	1	52000000	7.716
			2	58000000	7.76343
			3	54000000	7.73239
	5	1	1	100000000	8
			2	160000000	8.20412
			3	80000000	7.90309
		2	1	80000000	7.90309
			2	100000000	8
			3	120000000	8.07918
Planktonic with antibiotic	1	1	1	16000	4.20412
			2	22000	4.34242
			3	18000	4.25527
		2	1	12000	4.07918
			2	12000	4.07918
			3	18000	4.25527
	2	1	1	32000	4.50515
			2	32000	4.50515
			3	34000	4.53148
		2	1	30000	4.47712
			2	38000	4.57978
			3	32000	4.50515
	3	1	1	12000	4.07918
			2	18000	4.25527
			3	14000	4.14613
		2	1	10000	4
			2	18000	4.25527
			3	12000	4.07918
	4	1	1	1400	3.14613
			2	800	2.90309
			3	1200	3.07918
		2	1	1200	3.07918
			2	1800	3.25527
			3	1600	3.20412
	5	1	1	4000	3.60206
			2	4000	3.60206
			3	2000	3.30103
		2	1	4000	3.60206
			2	4000	3.60206
			3	4000	3.60206

## Sheet: Linezolid 6H
Strain:	S. epidermidis 9142		* Nd - Not detected
Antibiotic:	Gentamicin
Exposure time:	6 hours
CFU counting
Sample	Assay #	Biological replicate #	Technical replicate #	CFU/mL	Mean CFU/mL	Log CFU/mL
Biofilm Control	1	1	1		100000000	8
			2		80000000	7.90309
			3		160000000	8.20412
		2	1		120000000	8.07918
			2		80000000	7.90309
			3		100000000	8
	2	1	1		58000000	7.76343
			2		56000000	7.74819
			3		62000000	7.79239
		2	1		32000000	7.50515
			2		36000000	7.5563
			3		34000000	7.53148
	3	1	1		120000000	8.07918
			2		140000000	8.14613
			3		80000000	7.90309
		2	1		160000000	8.20412
			2		180000000	8.25527
			3		100000000	8
Biofilm with antibiotic	1	1	1		600000	5.77815
			2		800000	5.90309
			3		200000	5.30103
		2	1		200000	5.30103
			2		200000	5.30103
			3		1000000	6
	2	1	1		800000	5.90309
			2		1200000	6.07918
			3		1000000	6
		2	1		1200000	6.07918
			2		1000000	6
			3		1200000	6.07918
	3	1	1		2000000	6.30103
			2		2000000	6.30103
			3		4000000	6.60206
		2	1		2000000	6.30103
			2		6000000	6.77815
			3		2000000	6.30103
BRC Control	1	1	1		120000000	8.07918
			2		140000000	8.14613
			3		160000000	8.20412
		2	1		80000000	7.90309
			2		120000000	8.07918
			3		180000000	8.25527
	2	1	1		260000000	8.41497
			2		300000000	8.47712
			3		160000000	8.20412
		2	1		120000000	8.07918
			2		260000000	8.41497
			3		240000000	8.38021
	3	1	1		280000000	8.44716
			2		360000000	8.5563
			3		300000000	8.47712
		2	1		380000000	8.57978
			2		320000000	8.50515
			3		260000000	8.41497
BRC with antibiotic	1	1	1		2000000	6.30103
			2		2000000	6.30103
			3		4000000	6.60206
		2	1		2000000	6.30103
			2		2000000	6.30103
			3		4000000	6.60206
	2	1	1		4000000	6.60206
			2		4000000	6.60206
			3		4000000	6.60206
		2	1		2000000	6.30103
			2		6000000	6.77815
			3		6000000	6.77815
	3	1	1		6000000	6.77815
			2		8000000	6.90309
			3		2000000	6.30103
		2	1		10000000	7
			2		6000000	6.77815
			3		6000000	6.77815
Planktonic Control	1	1	1		42000000	7.62325
			2		48000000	7.68124
			3		50000000	7.69897
		2	1		46000000	7.66276
			2		52000000	7.716
			3		54000000	7.73239
	2	1	1		120000000	8.07918
			2		220000000	8.34242
			3		120000000	8.07918
		2	1		180000000	8.25527
			2		160000000	8.20412
			3		140000000	8.14613
	3	1	1		440000000	8.64345
			2		320000000	8.50515
			3		460000000	8.66276
		2	1		340000000	8.53148
			2		440000000	8.64345
			3		480000000	8.68124
Planktonic with antibiotic	1	1	1		400000	5.60206
			2		1000000	6
			3		800000	5.90309
		2	1		400000	5.60206
			2		800000	5.90309
			3		200000	5.30103
	2	1	1		4000000	6.60206
			2		2000000	6.30103
			3		8000000	6.90309
		2	1		4000000	6.60206
			2		2000000	6.30103
			3		2000000	6.30103
	3	1	1		10000000	7
			2		4000000	6.60206
			3		8000000	6.90309
		2	1		6000000	6.77815
			2		10000000	7
			3		12000000	7.07918

## Sheet: Tetracycline 6H
Strain:	S. epidermidis 9142		* Nd - Not detected
Antibiotic:	Tetracycline
Exposure time:	6 hours
CFU counting
Sample	Assay #	Biological replicate #	Technical replicate #	CFU/mL	Log CFU/mL
Biofilm Control	1	1	1	18000000	7.25527
			2	16000000	7.20412
			3	20000000	7.30103
		2	1	18000000	7.25527
			2	18000000	7.25527
			3	22000000	7.34242
	2	1	1	240000000	8.38021
			2	180000000	8.25527
			3	280000000	8.44716
		2	1	160000000	8.20412
			2	220000000	8.34242
			3	160000000	8.20412
	3	1	1	330000000	8.51851
			2	380000000	8.57978
			3	100000000	8
		2	1	510000000	8.70757
			2	735000000	8.86629
			3	Nd	Nd
Biofilm with antibiotic	1	1	1	2000000	6.30103
			2	4000000	6.60206
			3	4000000	6.60206
		2	1	4000000	6.60206
			2	2000000	6.30103
			3	2000000	6.30103
	2	1	1	4000000	6.60206
			2	4400000	6.64345
			3	5000000	6.69897
		2	1	4600000	6.66276
			2	5000000	6.69897
			3	4800000	6.68124
	3	1	1	170000	5.23045
			2	55000	4.74036
			3	440000	5.64345
		2	1	330000	5.51851
			2	170000	5.23045
			3	295000	5.46982
BRC Control	1	1	1	30000000	7.47712
			2	24000000	7.38021
			3	16000000	7.20412
		2	1	26000000	7.41497
			2	28000000	7.44716
			3	22000000	7.34242
	2	1	1	28000000	7.44716
			2	220000000	8.34242
			3	240000000	8.38021
		2	1	280000000	8.44716
			2	260000000	8.41497
			3	260000000	8.41497
	3	1	1	410000000	8.61278
			2	215000000	8.33244
			3	24500000	7.38917
		2	1	545000000	8.7364
			2	770000000	8.88649
			3	Nd	Nd
BRC with antibiotic	1	1	1	8000000	6.90309
			2	4000000	6.60206
			3	6000000	6.77815
		2	1	8000000	6.90309
			2	6000000	6.77815
			3	6000000	6.77815
	2	1	1	4000000	6.60206
			2	4200000	6.62325
			3	3600000	6.5563
		2	1	4200000	6.62325
			2	4400000	6.64345
			3	3000000	6.47712
	3	1	1	125000	5.09691
			2	69000	4.83885
			3	360000	5.5563
		2	1	700000	5.8451
			2	165000	5.21748
			3	145000	5.16137
Planktonic Control	1	1	1	28000000	7.44716
			2	18000000	7.25527
			3	20000000	7.30103
		2	1	22000000	7.34242
			2	18000000	7.25527
			3	26000000	7.41497
	2	1	1	340000000	8.53148
			2	320000000	8.50515
			3	240000000	8.38021
		2	1	300000000	8.47712
			2	280000000	8.44716
			3	320000000	8.50515
	3	1	1	350000000	8.54407
			2	260000000	8.41497
			3	95000000	7.97772
		2	1	340000000	8.53148
			2	395000000	8.5966
			3	Nd	Nd
Planktonic with antibiotic	1	1	1	200000	5.30103
			2	400000	5.60206
			3	400000	5.60206
		2	1	400000	5.60206
			2	400000	5.60206
			3	200000	5.30103
	2	1	1	1000000	6
			2	400000	5.60206
			3	800000	5.90309
		2	1	1000000	6
			2	200000	5.30103
			3	1200000	6.07918
	3	1	1	28000	4.44716
			2	8000	3.90309
			3	41000	4.61278
		2	1	38000	4.57978
			2	65200	4.81425
			3	Nd	Nd
